# Supplementary material for: Thermal stabilities and conformational behaviors of isocyanurates and cyclotrimerization energies of isocyanates: a computational study
Source: Royal Society of Chemistry journal article supplement (doi:10.1039/d0ra02463e), 2020-01-01
Supplement: d0ra02463e1.pdf [file d0ra02463e1.pdf]

## Thermal stabilities and conformational behaviors of isocyanurates and cyclotrimerization energies of isocyanates : a computational study

Tadafumi Uchimaru,<sup>a</sup> Shogo Yamane,<sup>a</sup> Junji Mizukado,<sup>a</sup> and Seiji Tsuzuki<sup>b</sup>

<sup>a</sup>*Research Institute for Sustainable Chemistry, National Institute of Advanced Industrial Science and Technology, Higashi, 1-1-1, Tsukuba, Ibaraki 305-8565 Japan*

<sup>b</sup>*Research Center for Computational Design of Advanced Functional Materials, National Institute of Advanced Industrial Science and Technology, Umezono, 1-1-1, Tsukuba, Ibaraki 305-8568 Japan*

### *Supplementary Information*

- Estimation of the cyclotrimerization energy of methyl isocyanate by using thermochemical data known in the literature
- Table S1 Calculated values for CH<sub>3</sub>-NCO bond dissociation enthalpy at 0 K and the estimates for the enthalpy of formation of methyl isocyanate at 298 K
- Table S2. Results of composite method calculations for the enthalpy values (in au) for CH<sub>3</sub>-NCO molecule and NCO and CH<sub>3</sub> radicals at 0 K and 298 K
- Table S3 Extrapolation of the ROCCSD(T) single point energies of CH<sub>3</sub>NCO molecule and NCO and CH<sub>3</sub> radicals to the basis set limit: estimation of the CH<sub>3</sub>-NCO bond dissociation enthalpy
- Table S4 Extrapolation of the UCCSD(T) single point energies of CH<sub>3</sub>NCO molecule and NCO and CH<sub>3</sub> radicals to the basis set limit: estimation of the CH<sub>3</sub>-NCO bond dissociation enthalpy
- Estimation of the cyclotrimerization energy of methyl isocyanate at the CCSD(T) basis set limit value
- Table S5 Single point energies of trimethyl isocyanurate and methyl isocyanate calculated with the aug-cc-pVXZ (X = D, T, Q) basis set: Estimate for the cyclotrimerization energy at the CCSD(T) basis set limit
- Table S6 Calculated energy differences between the extreme conformers of tri-*n*-alkyl isocyanurates
- NBO analysis for the resonance stabilization energies in the isocyanate and isocyanurate molecules
- Table S7 Resonance stabilization energies in isocyanate and isocyanurate molecules
- Figure S1 Structures of tri-*n*-hexyl and tri-*n*-octyl isocyanurate
- Figure S2 Optimized structures of isocyanate molecules
- The Cartesian coordinates of the optimized isocyanurates
- The Cartesian coordinates of the optimized isocyanates

## Estimation of the cyclotrimerization energy of methyl isocyanate by using thermochemical data known in the literature

We made estimation of the cyclotrimerization energy of methyl isocyanate by using thermochemical data known in the literature. Imamura et al. reported enthalpy of formation of trimethyl isocyanurate  $\Delta H_f$  at 298 K as  $-141.1 \pm 0.4$  kcal/mol ( $-590.5 \pm 1.6$  kJ/mol).<sup>1</sup> Although no literature thermochemical data is available for methyl isocyanate, the enthalpies of formation of NCO and CH<sub>3</sub> radicals have been reported. The reported values of  $\Delta H_f$  at 0 K values of NCO and CH<sub>3</sub> radicals are 30.5 kcal/mol and  $35.9 \pm 0.1$  kcal/mol ( $150.3 \pm 0.4$  kJ/mol), respectively.<sup>2,3</sup> We employed high level *ab initio* methods for computing the bond dissociation energy (BDE) of CH<sub>3</sub>-NCO. The *ab initio* derived BDE value and the literature values of the enthalpies of formation ( $\Delta H_f$ ) of the radicals enabled us to calculate the enthalpy of methyl isocyanate. Furthermore, by referring to the literature value for the enthalpy of formation of trimethyl isocyanurate, the cyclotrimerization enthalpy value of methyl isocyanate was obtained.

The composite *ab initio* procedures, such as CBS-APNO,<sup>4</sup> G3,<sup>5</sup> G4MP2,<sup>6</sup> and G4<sup>7</sup> methods, were employed for the computations of the CH<sub>3</sub>-NCO BDE and the corresponding estimates of enthalpy formation of methyl isocyanate (See Tables S1 and S2). Recent extensive benchmark results show that these composite procedures provide highly accurate thermochemical values for molecules<sup>8</sup> and radicals.<sup>9</sup>

The CH<sub>3</sub>-NCO BDE was also evaluated by applying the CCSD(T) energy assessments using the correlation consistent basis sets (aug-cc-pVXZ, X = D, T, Q, 5).<sup>10</sup> The single point energies of CH<sub>3</sub>NCO, NCO, and CH<sub>3</sub> are collected in Tables S3 and S4. Table S3 shows the ROCCSD(T) calculated values, whereas Table S4 shows UCCSD(T) calculated values. By using the two-point extrapolation schemes, we obtained the basis set limit values of the electronic energies at the CCSD(T) level, *i. e.*  $E_{\text{CCSDT}(limit)}$ . For the HF energy extrapolation, the procedure prescribed by Halkier et al.<sup>7,11</sup> was employed. Namely,

$$E_{\text{HF}(limit)}(X, X + 1) = \frac{E_{\text{HF}(X+1)} - E_{\text{HF}(X)} \exp^{i\alpha}(-\alpha)}{1 - \exp^{i\alpha}(-\alpha)}$$

where  $\alpha = 1.63$ . Meanwhile, the correlation energies at the CCSD(T) level were extrapolated according to the procedure reported by Helgaker et al.<sup>12</sup> Namely,

$$E_{\text{CCSDT } cor.(limit)}(X, X + 1) = \frac{(X + 1)^3 E_{\text{CCSDT } cor.(X+1)} - X^3 E_{\text{CCSDT } cor.(X)}}{(X + 1)^3 - X^3}$$

The values of  $E_{\text{CCSDT}(limit)}$  were obtained with the following equation.

$$E_{\text{CCSDT}(limit)} = E_{\text{HF}(limit)}(X, X + 1) + E_{\text{CCSDT } cor.(limit)}(X, X + 1)$$

The single point energies calculated with the basis sets of aug-cc-pVQZ and aug-cc-pV5Z were employed for the extrapolation to the basis set limit. That is, X = 4 for the above equations in

the present case. The same procedure was applied for the results shown in Tables S3 and S4. The  $E_{\text{CCSDT (limit)}}$  values obtained from Tables S3 and S4 are almost identical. Table S1 shows the result obtained from the extrapolation of ROCCSD(T) single point energies given in Table S3.

These computational methods suggested us  $\text{CH}_3\text{-NCO}$  BDE values at 0 K ranging from 88 and 91 kcal/mol (Table S1). Based on these values, the enthalpy of formation  $\Delta H_f$  of methyl isocyanate at 298 K was estimated to be in the range from  $-24$  to  $-26$  kcal/mol (Table S1). Referring to the enthalpy of formation of trimethyl isocyanurate, the cyclotrimerization enthalpy of methyl isocyanate was estimated to be between  $-62$  and  $-70$  kcal/mol.

Table S1 Calculated values for  $\text{CH}_3\text{-NCO}$  bond dissociation enthalpy at 0 K and the estimates for the enthalpy of formation of methyl isocyanate at 298 K

| Computational method                                    | $BDE_{0\text{ K}}^{\text{a}}$ | $\Delta H_{f\ 298\text{ K}}^{\text{a,b}}$ |
|---------------------------------------------------------|-------------------------------|-------------------------------------------|
| CBS-APNO                                                | 89.7                          | $-25.3$                                   |
| G3                                                      | 87.9                          | $-23.5$                                   |
| G4MP2                                                   | 88.2                          | $-23.8$                                   |
| G4                                                      | 88.5                          | $-24.1$                                   |
| Basis set limit value at the CCSD(T) level <sup>c</sup> | 90.9                          | $-26.4$                                   |

<sup>a</sup> See the text.

<sup>b</sup> According to the procedure prescribed by Curtiss et al.,<sup>13</sup> the values of  $\Delta H_{f\ 298\text{ K}}$  were derived from those of  $\Delta H_{f\ 0\text{ K}}$ .

<sup>c</sup> See Tables S3.

Table S2. Results of composite method calculations for the enthalpy values (in au) for CH<sub>3</sub>-NCO molecule and NCO and CH<sub>3</sub> radicals at 0 K and 298 K

| Computational method | Temperature | CH <sub>3</sub> -NCO | NCO         | CH <sub>3</sub> |
|----------------------|-------------|----------------------|-------------|-----------------|
| CBS-APNO             | 0 K         | -207.931424          | -167.984792 | -39.803682      |
|                      | 298 K       | -207.925719          | -167.981124 | -39.799526      |
| G3                   | 0 K         | -207.854151          | -167.920789 | -39.793292      |
|                      | 298 K       | -207.848367          | -167.917060 | -39.789046      |
| G4MP2                | 0 K         | -207.728638          | -167.826662 | -39.761454      |
|                      | 298 K       | -207.722949          | -167.822973 | -39.757408      |
| G4                   | 0 K         | -207.891750          | -167.950718 | -39.799954      |
|                      | 298 K       | -207.886061          | -167.947028 | -39.795909      |

Table S3 Extrapolation of the ROCCSD(T) single point energies of CH<sub>3</sub>NCO molecule and NCO and CH<sub>3</sub> radicals to the basis set limit: estimation of the CH<sub>3</sub>–NCO bond dissociation enthalpy<sup>a</sup>

|                          |                     | CH <sub>3</sub> NCO | NCO         | CH <sub>3</sub> | $BDE_e$<br>(kcal/mol) | $BDE_0$<br>(kcal/mol) |
|--------------------------|---------------------|---------------------|-------------|-----------------|-----------------------|-----------------------|
| <i>ZPE</i>               |                     | 0.050099            | 0.011132    | 0.029594        |                       |                       |
| Basis set                | Computational level |                     |             |                 |                       |                       |
| aug-cc-pVDZ              | HF                  | -206.818612         | -167.145021 | -39.561662      |                       |                       |
|                          | CCSDT               | -207.496886         | -167.627183 | -39.724163      | 91.328                |                       |
|                          | $E_{\text{corr}}$   | -0.678274           | -0.482162   | -0.162501       |                       |                       |
| aug-cc-pVTZ              | HF                  | -206.869569         | -167.183126 | -39.573498      |                       |                       |
|                          | CCSDT               | -207.676651         | -167.761606 | -39.763629      | 95.015                |                       |
|                          | $E_{\text{corr}}$   | -0.807082           | -0.578480   | -0.190131       |                       |                       |
| aug-cc-pVQZ              | HF                  | -206.882487         | -167.193589 | -39.575897      |                       |                       |
|                          | CCSDT               | -207.729380         | -167.802743 | -39.773318      | 96.209                |                       |
|                          | $E_{\text{corr}}$   | -0.846893           | -0.609154   | -0.197421       |                       |                       |
| aug-cc-pV5Z              | HF                  | -206.885366         | -167.195849 | -39.576516      |                       |                       |
|                          | CCSDT               | -207.745594         | -167.815679 | -39.776129      | 96.502                |                       |
|                          | $E_{\text{corr}}$   | -0.860228           | -0.619830   | -0.199613       |                       |                       |
| $HF_{\text{limit}}$      |                     | -206.886068         | -167.196400 | -39.576667      |                       |                       |
| $E_{\text{corr limit}}$  |                     | -0.874219           | -0.631031   | -0.201913       |                       |                       |
| $E_{\text{CCSDT limit}}$ |                     | -207.760286         | -167.827431 | -39.778580      | 96.810                |                       |
| $E_0$                    |                     | -207.710187         | -167.816299 | -39.748986      |                       | 90.928                |

<sup>a</sup> Geometry optimizations were carried out at the MP2/6-311+G(2df,p) level. The zero point energies were computed using scale factor of 0.9777 prescribed by Merrick et al.<sup>14</sup>

Table S4 Extrapolation of the UCCSD(T) single point energies of CH<sub>3</sub>NCO molecule and NCO and CH<sub>3</sub> radicals to the basis set limit: estimation of the CH<sub>3</sub>-NCO bond dissociation enthalpy<sup>a</sup>

|                          |                     | CH <sub>3</sub> NCO | NCO         | CH <sub>3</sub> | $BDE_e$<br>(kcal/mol) | $BDE_0$<br>(kcal/mol) |
|--------------------------|---------------------|---------------------|-------------|-----------------|-----------------------|-----------------------|
| <i>ZPE</i>               |                     | 0.050099            | 0.011132    | 0.029594        |                       |                       |
| Basis set                | Computational level |                     |             |                 |                       |                       |
| aug-cc-pVDZ              | HF                  | -206.818612         | -167.153878 | -39.565801      |                       |                       |
|                          | CCSDT               | -207.496886         | -167.627020 | -39.724178      | 91.421                |                       |
|                          | $E_{\text{corr}}$   | -0.678274           | -0.473142   | -0.158377       |                       |                       |
| aug-cc-pVTZ              | HF                  | -206.869569         | -167.192303 | -39.578016      |                       |                       |
|                          | CCSDT               | -207.676651         | -167.761405 | -39.763648      | 95.129                |                       |
|                          | $E_{\text{corr}}$   | -0.807082           | -0.569102   | -0.185632       |                       |                       |
| aug-cc-pVQZ              | HF                  | -206.882487         | -167.202825 | -39.580445      |                       |                       |
|                          | CCSDT               | -207.729380         | -167.802541 | -39.773339      | 96.323                |                       |
|                          | $E_{\text{corr}}$   | -0.846893           | -0.599716   | -0.192894       |                       |                       |
| aug-cc-pV5Z              | HF                  | -206.885366         | -167.205097 | -39.581070      |                       |                       |
|                          | CCSDT               | -207.745594         | -167.815431 | -39.776144      | 96.648                |                       |
|                          | $E_{\text{corr}}$   | -0.860228           | -0.610334   | -0.195074       |                       |                       |
| $HF_{\text{limit}}$      |                     | -206.886068         | -167.205651 | -39.581222      |                       |                       |
| $E_{\text{corr limit}}$  |                     | -0.874219           | -0.621474   | -0.197361       |                       |                       |
| $E_{\text{CCSDT limit}}$ |                     | -207.760286         | -167.827125 | -39.778584      | 96.999                |                       |
| $E_0$                    |                     | -207.710187         | -167.815993 | -39.748990      |                       | 91.118                |

<sup>a</sup> Geometry optimizations were carried out at the MP2/6-311+G(2df,p) level. The zero point energies were computed using scale factor of 0.9777 prescribed by Merrick et al.<sup>14</sup>

### Estimation of the cyclotrimerization energy of methyl isocyanate at the CCSD(T) basis set limit value

By using two-point extrapolation schemes, the HF energies and the MP2 correlation energies calculated with the basis sets of the aug-cc-pVTZ and aug-cc-pVQZ were extrapolated. For the HF energy extrapolation, we employed the procedure developed by Halkier et al.<sup>7,11</sup> The basis set limit energy value at the HF level  $E_{HF(limit)}(3, 4)$  is given by the following equation:

$$E_{HF(limit)}(3, 4) = \frac{E_{HF(4)} - E_{HF(3)} \exp^{(3)}(-\alpha)}{1 - \exp^{(3)}(-\alpha)}$$

where  $\alpha = 1.63$ . Meanwhile, the MP2 correlation energies were extrapolated using the procedure prescribed by Helgaker et al.<sup>12</sup> The MP2 correlation energy at the basis set limit  $E_{MP2 cor.(limit)}$  is given by the following equation:

$$E_{MP2 cor.(limit)} = \frac{4^3 E_{MP2 cor.(4)} - 3^3 E_{MP2 cor.(3)}}{4^3 - 3^3}$$

In addition, we considered values of  $\Delta_{CCSDT(2)}$  and  $\gamma$ . The former is the difference between the MP2 and CCSD(T) energies calculated with the basis set of the aug-cc-pVDZ. The latter is the ratio of the MP2 correlation energy calculated with the aug-cc-pVDZ relative to the MP2 correlation energy at the basis set limit  $E_{MP2 cor.(limit)}$ . Namely,

$$\Delta_{CCSDT(2)} = E_{CCSDT(2)} - E_{MP2(2)}$$

$$\gamma = \frac{E_{MP2 cor.(2)}}{E_{MP2 cor.(limit)}}$$

The following equation shows our estimated CCSD(T) energy value at the basis set limit,  $E_{CCSDT(limit)}$ .

$$E_{CCSDT(limit)} = E_{HF(limit)}(3, 4) + E_{MP2 cor.(limit)} + \frac{\Delta_{CCSDT(2)}}{\gamma}$$

Through the above described procedures, we obtained an estimate for the electronic energy change upon cyclotrimerization of methyl isocyanate. Our estimated CCSD(T) energy value at the basis set limit is  $-71.6$  kcal/mol.

Table S5 Single point energies of trimethyl isocyanurate and methyl isocyanate calculated with the aug-cc-pVXZ (X = D, T, Q) basis set: Estimate for the cyclotrimerization energy at the CCSD(T) basis set limit

| Basis set<br>(X)    | Trimer<br>(Isocyanurate) | Monomer<br>(Isocyanate) | Cyclotrimerization<br>energy<br>(kcal/mol) |
|---------------------|--------------------------|-------------------------|--------------------------------------------|
| HF                  |                          |                         |                                            |
| D                   | -620.555658              | -206.819741             | -60.5                                      |
| T                   | -620.701172              | -206.871144             | -55.1                                      |
| Q                   | -620.739444              | -206.884130             | -54.6                                      |
| MP2                 |                          |                         |                                            |
| D                   | -622.474844              | -207.453549             | -71.7                                      |
| T                   | -623.008363              | -207.633158             | -68.3                                      |
| Q                   | -623.181816              | -207.691365             | -67.6                                      |
| CCSD(T)             |                          |                         |                                            |
| D                   | -622.607359              | -207.495947             | -75.0                                      |
| T                   |                          |                         |                                            |
| CCSD(T)limit        |                          |                         | -71.6                                      |
| Enthalpy correction |                          |                         | 5.1                                        |
| $\Delta H$          |                          |                         | -66.4                                      |



Table S6 Calculated energy differences between the extreme conformers of tri-*n*-alkyl isocyanurates<sup>a</sup>

| R                                | Computational level |                 |                        |                          |                  |                       |                       |
|----------------------------------|---------------------|-----------------|------------------------|--------------------------|------------------|-----------------------|-----------------------|
|                                  | B3LYP <sup>b</sup>  | HF <sup>b</sup> | B3LYP-GD3 <sup>b</sup> | B3LYP-GD3BJ <sup>b</sup> | MP2 <sup>b</sup> | ONIOM(1) <sup>c</sup> | ONIOM(2) <sup>d</sup> |
| Me<br>( $C_s - C_{3h}$ )         | 0.04                | 0.04            | 0.05                   | 0.04                     | 0.05             | 0.05                  | 0.05                  |
| Et<br>( $C_s - C_{3v}$ )         | -0.06               | -0.04           | 0.07                   | 0.04                     | 0.07             | 0.07                  | 0.07                  |
| <i>n</i> -Pr<br>( $C_s - C_3$ )  | -3.78               | -4.59           | 0.07                   | -0.05                    | 0.52             | 0.05                  | 0.53                  |
| <i>n</i> -Bu<br>( $C_s - C_3$ )  | -4.43               | -5.33           | 0.63                   | 0.47                     | 1.24             | 0.06                  | 1.25                  |
| <i>n</i> -Hex<br>( $C_s - C_3$ ) | -10.02              | -12.75          | 5.57                   | 4.92                     | 5.08             | 5.61                  | 5.12                  |
| <i>n</i> -Oct<br>( $C_s - C_3$ ) | -11.16              |                 | 9.53                   | 8.63                     |                  | 9.56                  |                       |

<sup>a</sup> The energy differences between the conformers calculated with taking the BSSEs into account are given in kcal/mol. Positive values indicate that the conformers possessing the  $C_3$  axis are lower in energy than the  $C_s$  isomers. The geometries of the conformers were optimized at the B3LYP-GD3/cc-pVTZ level. The BSSE-uncorrected energy differences between the conformers are given in Table 3, but almost identical results were obtained whether or not the BSSEs were taken into account.

<sup>b</sup> The cc-pVTZ basis set was utilized.

<sup>c</sup> ONIOM(CCSD(T)/cc-pVTZ:B3LYP-GD3/cc-pVTZ)

<sup>d</sup> ONIOM(CCSD(T)/cc-pVTZ:MP2/cc-pVTZ)

## **NBO analysis for the resonance stabilization energies in the isocyanate and isocyanurate molecules**

The NBO analysis was applied to examine the differences in the resonance orbital interactions between the trialkyl isocyanates and the phenyl substituted analogue. The NBO program version 6.0<sup>15</sup> implemented in the Gaussian 09 was employed. There have been reported criticisms that the second order perturbation theory in the NBO analysis tends to overestimate the resonance energies.<sup>16,17</sup> However, the NBO analysis would be helpful in obtaining at least qualitatively correct pictures or trends.

Table S7 shows the calculated resonance stabilization energies due to the orbital interactions between the substituents and the NCO moiety in the isocyanate molecules. In addition, those between the substituents and the isocyanate ring in the isocyanurate molecules are also shown in Table S7. The resonance stabilization energy was found to be considerably smaller for triphenyl isocyanurate than for phenyl isocyanate. Namely, for the phenyl derivative, the resonance stabilization energy will be reduced upon the cyclotrimerization. For the alkyl-substituted derivatives, the degree of the change in the resonance stabilization upon cyclotrimerization was indicated to be relatively smaller than for the phenyl derivative. These differences between phenyl and alkyl derivatives are inferred as the main cause of the difference in trend between these two types of derivatives seen in Figure 4b.

Table S7 Resonance stabilization energies in isocyanate and isocyanurate molecules<sup>a</sup>

| <i>R</i>      |                     | $R \rightarrow \text{NCO/ICN}^{\text{b}}$ | $R \leftarrow \text{NCO/ICN}^{\text{c}}$ | $R \rightleftharpoons \text{NCO/ICN}^{\text{d}}$ |
|---------------|---------------------|-------------------------------------------|------------------------------------------|--------------------------------------------------|
| Me            | R–N=C=O             | 16.0                                      | 23.0                                     | 38.4                                             |
|               | isocyanurate        | 16.2                                      | 18.9                                     | 35.0                                             |
|               | $\Delta^{\text{e}}$ | 0.2                                       | -4.1                                     | -3.4                                             |
| <i>n</i> -Oct | R–N=C=O             | 17.2                                      | 25.1                                     | 41.6                                             |
|               | isocyanurate        | 18.7                                      | 22.6                                     | 41.0                                             |
|               | $\Delta^{\text{e}}$ | 1.5                                       | -2.5                                     | -0.6                                             |
| Ph            | R–N=C=O             | 20.8                                      | 38.9                                     | 58.0                                             |
|               | isocyanurate        | 20.7                                      | 29.5                                     | 49.7                                             |
|               | $\Delta^{\text{e}}$ | -0.1                                      | -9.4                                     | -8.3                                             |

<sup>a</sup> The resonance stabilization energies were evaluated with the second order perturbation theory. The abbreviation of ICN stands for the isocyanurate ring. Energy values are given in kcal/mol.

<sup>b</sup> The stabilization energies due to the resonance interactions between the bonding orbitals in the substituent and the anti-bonding orbitals of NCO moiety or isocyanurate ring.

<sup>c</sup> The stabilization energies due to the resonance interactions between the anti-bonding orbitals in the substituent and the bonding orbitals of NCO moiety or isocyanurate ring.

<sup>d</sup> The stabilization energies due to the resonance interactions between the orbitals in the substituent and those of NCO moiety or isocyanurate ring.

<sup>e</sup> The difference between the isocyanate and isocyanurate molecules.

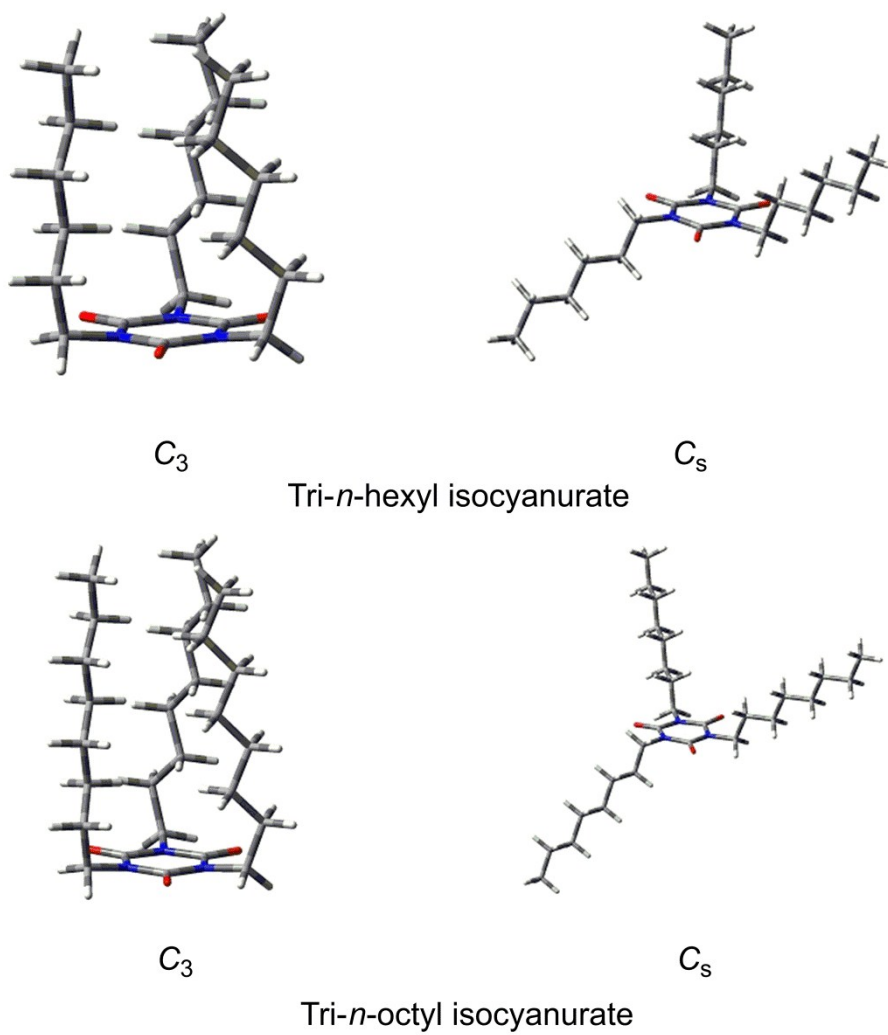

Figure S1 Structures of tri-*n*-hexyl and tri-*n*-octyl isocyanurate

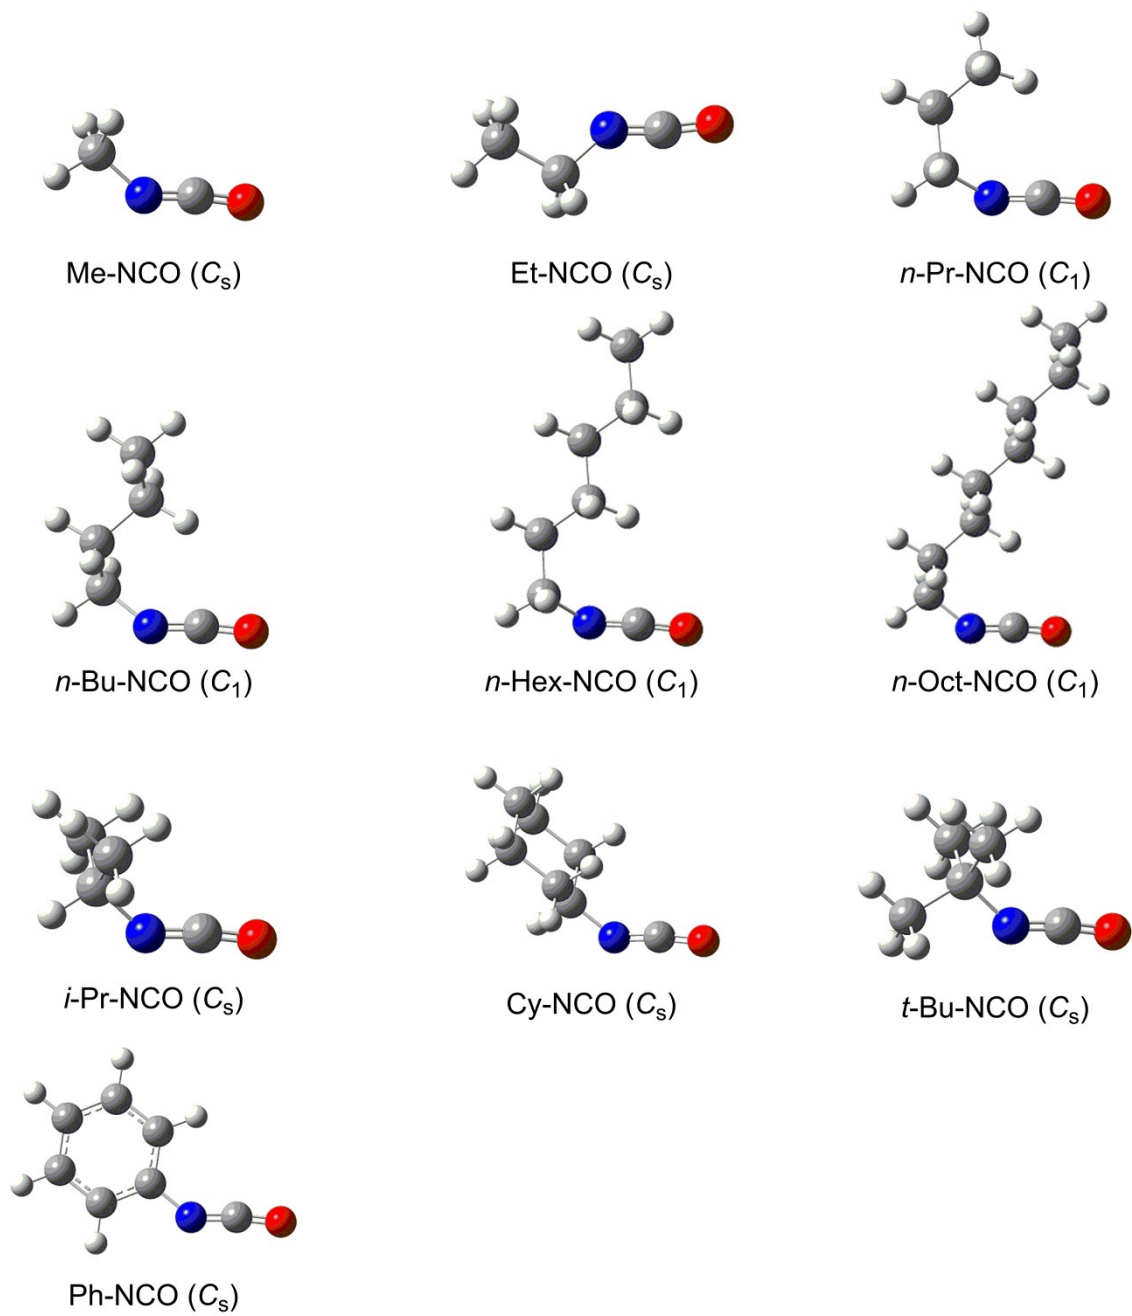

Figure 2S Optimized structures of isocyanate molecules

## References

- 1 A. Imamura, K. Takahashi, S. Murata and M. Sakiyama, *J. Chem. Thermodynamics*, 1989, **21**, 237-246.
- 2 Y. Ji, P. Bobadova-Parvanova, C. Larson, P. C. Samartis, K. Morokuma, J. J-M. Lin, T.-T. Ching, C. Chaudhuri, S.-H. Lee and A. M. Wodtke, *J. Chem. Phys.*, 2006, **124**, 241106.
- 3 E. A. Fogleman, H. Koizumi, J. P. Kercher, B. Sztáray and T. Baer, *J. Phys. Chem. A*, 2004, **108**, 5288-5294.
- 4 J. W. Ochterski, G. A. Petersson and J. A. Montgomery Jr., *J. Chem. Phys.*, 1996, **104**, 2598-2619.
- 5 L. A. Curtiss, K. Raghavachari, P. C. Redfern, V. Rassolve and J. A. Pople, *J. Chem. Phys.*, 1998, **109**, 7764-7776.
- 6 L. A. Curtiss, P. C. Redfern and K. Raghavachari, *J. Chem. Phys.*, 2007, **127**, 124105.
- 7 L. A. Curtiss, P. C. Redfern and K. Raghavachari, *J. Chem. Phys.*, 2007, **126**, 084108.
- 8 J. M. Simmie and K. P. Somers, *J. Phys. Chem. A*, 2015, **119**, 7235-7246.
- 9 K. P. Somers and J. M. Simmie, *J. Phys. Chem. A*, 2015, **119**, 8922-8933.
- 10 a) T. H. Dunning Jr., *J. Chem. Phys.* 1989, **90**, 1007-1023; b) R. A. Kendall and T. H. Dunning Jr., *J. Chem. Phys.*, 1992, **96**, 6796-6806.
- 11 A. Halkier, T. Helgaker, P. Jørgensen, W. Klopper and J. Olsen, *Chem. Phys. Lett.*, 1999, **302**, 437-446.
- 12 T. Helgaker, W. Klopper, H. Koch and J. Noga, *J. Chem. Phys.*, 1997, **106**, 9639-9646.
- 13 L. A. Curtiss, K. Raghavachari, P. C. Redfern and J. A. Pople, *J. Chem. Phys.*, 1997, **106**, 1063-1079.
- 14 J. P. Merrick, D. Moran and L. Radom, *J. Chem. Phys. A*, 2007, **111**, 11683-11700.
- 15 E. D. Glendening, C. R. Landis and F. Weinhold, *J. Comput. Chem.*, 2013, **34**, 1429-1437.
- 16 S. Karthikeyan, R. Dedlak and P. Hobza, *J. Phys. Chem. A*, 2011, **115**, 9422-9428.
- 17 A. J. Stone, *J. Phys. Chem. A*, 2017, **121**, 1531-1534.

## The Cartesian coordinates of the optimized isocyanurates

| Trimethyl isocyanurate (C <sub>3h</sub> ) (RB3LYP) = -624.312105020 |   |   |           |           |          |
|---------------------------------------------------------------------|---|---|-----------|-----------|----------|
| 1                                                                   | 6 | 0 | -1.229136 | 0.711057  | 0.000000 |
| 2                                                                   | 7 | 0 | 0.000000  | 1.356441  | 0.000000 |
| 3                                                                   | 6 | 0 | 1.230361  | 0.708935  | 0.000000 |
| 4                                                                   | 7 | 0 | 1.174712  | -0.678221 | 0.000000 |
| 5                                                                   | 6 | 0 | -0.001225 | -1.419991 | 0.000000 |
| 6                                                                   | 7 | 0 | -1.174712 | -0.678221 | 0.000000 |
| 7                                                                   | 8 | 0 | -2.269391 | 1.332034  | 0.000000 |
| 8                                                                   | 8 | 0 | 2.288271  | 1.299333  | 0.000000 |
| 9                                                                   | 8 | 0 | -0.018880 | -2.631367 | 0.000000 |
| 10                                                                  | 6 | 0 | -2.428207 | -1.439769 | 0.000000 |

| Triethyl isocyanurate (C <sub>3v</sub> ) E(RB3LYP) = -742.315946725 |   |   |           |           |           |
|---------------------------------------------------------------------|---|---|-----------|-----------|-----------|
| 1                                                                   | 7 | 0 | -1.175428 | 0.678634  | -0.384166 |
| 2                                                                   | 6 | 0 | 0.000000  | 1.418165  | -0.351957 |
| 3                                                                   | 7 | 0 | 1.175428  | 0.678634  | -0.384166 |
| 4                                                                   | 6 | 0 | 1.228167  | -0.709082 | -0.351957 |
| 5                                                                   | 7 | 0 | 0.000000  | -1.357268 | -0.384166 |
| 6                                                                   | 6 | 0 | -1.228167 | -0.709082 | -0.351957 |
| 7                                                                   | 8 | 0 | 0.000000  | 2.629876  | -0.300934 |
| 8                                                                   | 8 | 0 | 2.277540  | -1.314938 | -0.300934 |
| 9                                                                   | 8 | 0 | -2.277540 | -1.314938 | -0.300934 |
| 10                                                                  | 6 | 0 | -2.903434 | 1.676298  | 1.097765  |
| 11                                                                  | 6 | 0 | -2.452811 | 1.416131  | -0.333168 |

| Trimethyl isocyanurate (C <sub>s</sub> ) E(RB3LYP) = -624.312027966 |   |   |           |           |          |
|---------------------------------------------------------------------|---|---|-----------|-----------|----------|
| 1                                                                   | 6 | 0 | 0.005570  | -1.432099 | 0.000000 |
| 2                                                                   | 7 | 0 | -1.169263 | -0.687796 | 0.000000 |
| 3                                                                   | 6 | 0 | -1.222255 | 0.699122  | 0.000000 |
| 4                                                                   | 7 | 0 | 0.000000  | 1.354345  | 0.000000 |
| 5                                                                   | 6 | 0 | 1.230181  | 0.708856  | 0.000000 |
| 6                                                                   | 7 | 0 | 1.176373  | -0.679477 | 0.000000 |
| 7                                                                   | 8 | 0 | 0.009608  | -2.643422 | 0.000000 |
| 8                                                                   | 8 | 0 | -2.273706 | 1.301211  | 0.000000 |
| 9                                                                   | 8 | 0 | 2.287453  | 1.300372  | 0.000000 |
| 10                                                                  | 6 | 0 | 2.467718  | -1.376359 | 0.000000 |
| 11                                                                  | 6 | 0 | -2.458345 | -1.387694 | 0.000000 |

|    |   |   |           |           |           |
|----|---|---|-----------|-----------|-----------|
| 24 | 1 | 0 | 3.182018  | 0.814180  | -0.866643 |
| 25 | 1 | 0 | 2.296109  | 2.348619  | -0.866643 |
| 26 | 1 | 0 | 0.000000  | -4.443017 | 1.096564  |
| 27 | 1 | 0 | 0.888573  | -3.012625 | 1.628755  |
| 28 | 1 | 0 | -0.888573 | -3.012625 | 1.628755  |
| 29 | 1 | 0 | -0.885909 | -3.162798 | -0.866643 |
| 30 | 1 | 0 | 0.885909  | -3.162798 | -0.866643 |

**Triethyl isocyanurate (C<sub>3</sub>) E(RB3LYP) = -742.315835805**

|    |   |   |           |           |           |
|----|---|---|-----------|-----------|-----------|
| 1  | 7 | 0 | -0.307644 | -0.629233 | 1.175154  |
| 2  | 6 | 0 | 0.046153  | 0.712978  | 1.228512  |
| 3  | 7 | 0 | 0.237966  | 1.332361  | 0.000000  |
| 4  | 6 | 0 | 0.046153  | 0.712978  | -1.228512 |
| 5  | 7 | 0 | -0.307644 | -0.629233 | -1.175154 |
| 6  | 6 | 0 | -0.438089 | -1.358250 | 0.000000  |
| 7  | 8 | 0 | 0.185410  | 1.303335  | 2.278738  |
| 8  | 8 | 0 | 0.185410  | 1.303335  | -2.278738 |
| 9  | 8 | 0 | -0.666814 | -2.549233 | 0.000000  |
| 10 | 6 | 0 | 0.851523  | -1.935647 | 2.942887  |
| 11 | 6 | 0 | -0.465911 | -1.350166 | 2.453168  |
| 12 | 6 | 0 | -0.623757 | 3.662680  | 0.000000  |
| 13 | 6 | 0 | 0.603930  | 2.762159  | 0.000000  |
| 14 | 6 | 0 | 0.851523  | -1.935647 | -2.942887 |
| 15 | 6 | 0 | -0.465911 | -1.350166 | -2.453168 |
| 16 | 1 | 0 | 0.697315  | -2.459061 | 3.886973  |
| 17 | 1 | 0 | 1.246674  | -2.647627 | 2.219010  |
| 18 | 1 | 0 | 1.584112  | -1.145993 | 3.107161  |
| 19 | 1 | 0 | -0.862668 | -0.635320 | 3.167514  |
| 20 | 1 | 0 | -1.198595 | -2.132775 | 2.281751  |
| 21 | 1 | 0 | -0.316918 | 4.709059  | 0.000000  |
| 22 | 1 | 0 | -1.229079 | 3.485130  | -0.888392 |
| 23 | 1 | 0 | -1.229079 | 3.485130  | 0.888392  |
| 24 | 1 | 0 | 1.208450  | 2.929988  | 0.886040  |
| 25 | 1 | 0 | 1.208450  | 2.929988  | -0.886040 |
| 26 | 1 | 0 | 0.697315  | -2.459061 | -3.886973 |
| 27 | 1 | 0 | 1.584112  | -1.145993 | -3.107161 |

|    |   |   |           |           |           |
|----|---|---|-----------|-----------|-----------|
| 28 | 1 | 0 | 1.246674  | -2.647627 | -2.219010 |
| 29 | 1 | 0 | -1.198595 | -2.132775 | -2.281751 |
| 30 | 1 | 0 | -0.862668 | -0.635320 | -3.167514 |

**Tri-*n*-propyl isocyanurate (C<sub>3</sub>) E(RB3LYP) = -860.309214480**

|    |   |   |           |           |           |
|----|---|---|-----------|-----------|-----------|
| 1  | 7 | 0 | 0.093606  | 1.354646  | -0.757531 |
| 2  | 6 | 0 | -1.176283 | 0.792819  | -0.755438 |
| 3  | 7 | 0 | -1.219961 | -0.596257 | -0.757531 |
| 4  | 6 | 0 | -0.098460 | -1.415101 | -0.755438 |
| 5  | 7 | 0 | 1.126354  | -0.758388 | -0.757531 |
| 6  | 6 | 0 | 1.274743  | 0.622282  | -0.755438 |
| 7  | 8 | 0 | -2.177090 | 1.477504  | -0.749012 |
| 8  | 8 | 0 | -0.191011 | -2.624168 | -0.749012 |
| 9  | 8 | 0 | 2.368101  | 1.146663  | -0.749012 |
| 10 | 6 | 0 | 0.934452  | 2.858222  | 1.748689  |
| 11 | 6 | 0 | -0.060050 | 3.373293  | 0.709526  |
| 12 | 6 | 0 | 0.178334  | 2.828124  | -0.698337 |
| 13 | 6 | 0 | -2.942519 | -0.619851 | 1.748689  |
| 14 | 6 | 0 | -2.891333 | -1.738651 | 0.709526  |
| 15 | 6 | 0 | -2.538394 | -1.259620 | -0.698337 |
| 16 | 6 | 0 | 2.008066  | -2.238370 | 1.748689  |
| 17 | 6 | 0 | 2.951382  | -1.634642 | 0.709526  |
| 18 | 6 | 0 | 2.360060  | -1.568504 | -0.698337 |
| 19 | 1 | 0 | 0.742651  | 3.308033  | 2.723067  |
| 20 | 1 | 0 | 0.858114  | 1.776087  | 1.869043  |
| 21 | 1 | 0 | 1.962012  | 3.081907  | 1.461533  |
| 22 | 1 | 0 | 0.000000  | 4.462578  | 0.645404  |
| 23 | 1 | 0 | -1.081252 | 3.134284  | 1.009015  |
| 24 | 1 | 0 | 1.169469  | 3.091225  | -1.054284 |
| 25 | 1 | 0 | -0.567294 | 3.218911  | -1.385612 |
| 26 | 1 | 0 | -3.236166 | -1.010862 | 2.723067  |
| 27 | 1 | 0 | -1.967194 | -0.144895 | 1.869043  |
| 28 | 1 | 0 | -3.650016 | 0.158199  | 1.461533  |
| 29 | 1 | 0 | -3.864706 | -2.231289 | 0.645404  |
| 30 | 1 | 0 | -2.173744 | -2.503534 | 1.009015  |
| 31 | 1 | 0 | -3.261814 | -0.532822 | -1.054284 |



|    |   |   |           |           |           |
|----|---|---|-----------|-----------|-----------|
| 32 | 1 | 0 | -2.504012 | -2.100747 | -1.385612 |
| 33 | 1 | 0 | 2.493516  | -2.297171 | 2.723067  |
| 34 | 1 | 0 | 1.109079  | -1.631192 | 1.869043  |
| 35 | 1 | 0 | 1.688004  | -3.240106 | 1.461533  |
| 36 | 1 | 0 | 3.864706  | -2.231289 | 0.645404  |
| 37 | 1 | 0 | 3.254996  | -0.630751 | 1.009015  |
| 38 | 1 | 0 | 2.092345  | -2.558402 | -1.054284 |
| 39 | 1 | 0 | 3.071306  | -1.118164 | -1.385612 |

|    |   |   |           |           |           |
|----|---|---|-----------|-----------|-----------|
| 27 | 1 | 0 | -0.579696 | 5.381234  | -0.882299 |
| 28 | 1 | 0 | -0.579696 | 5.381234  | 0.882299  |
| 29 | 1 | 0 | 1.113135  | 3.517348  | 0.880834  |
| 30 | 1 | 0 | 1.113135  | 3.517348  | -0.880834 |
| 31 | 1 | 0 | -1.290851 | 2.884283  | -0.886391 |
| 32 | 1 | 0 | -1.290851 | 2.884283  | 0.886391  |
| 33 | 1 | 0 | -1.387165 | -3.163499 | -4.617662 |
| 34 | 1 | 0 | -0.127092 | -2.008806 | -5.046748 |
| 35 | 1 | 0 | 0.286024  | -3.480216 | -4.164653 |
| 36 | 1 | 0 | -1.039096 | -2.664069 | -2.185408 |
| 37 | 1 | 0 | -1.451765 | -1.195157 | -3.066340 |
| 38 | 1 | 0 | 0.953795  | -0.575844 | -3.170698 |
| 39 | 1 | 0 | 1.368586  | -2.053961 | -2.284465 |

**Tri-*n*-propyl isocyanurate (C<sub>3</sub>) E(RB3LYP) = -860.309048593**

|    |   |   |           |           |           |
|----|---|---|-----------|-----------|-----------|
| 1  | 7 | 0 | 0.402885  | -0.596426 | 1.175127  |
| 2  | 6 | 0 | -0.018901 | 0.725962  | 1.228503  |
| 3  | 7 | 0 | -0.241114 | 1.335018  | 0.000000  |
| 4  | 6 | 0 | -0.018901 | 0.725962  | -1.228503 |
| 5  | 7 | 0 | 0.402885  | -0.596426 | -1.175127 |
| 6  | 6 | 0 | 0.571968  | -1.317412 | 0.000000  |
| 7  | 8 | 0 | -0.188716 | 1.308307  | 2.278813  |
| 8  | 8 | 0 | -0.188716 | 1.308307  | -2.278813 |
| 9  | 8 | 0 | 0.863739  | -2.494633 | 0.000000  |
| 10 | 6 | 0 | -0.466314 | -2.695971 | 4.269123  |
| 11 | 6 | 0 | -0.687353 | -1.965434 | 2.946931  |
| 12 | 6 | 0 | 0.596704  | -1.307650 | 2.451279  |
| 13 | 6 | 0 | 0.025657  | 5.164278  | 0.000000  |
| 14 | 6 | 0 | 0.498441  | 3.712652  | 0.000000  |
| 15 | 6 | 0 | -0.678664 | 2.742370  | 0.000000  |
| 16 | 6 | 0 | -0.466314 | -2.695971 | -4.269123 |
| 17 | 6 | 0 | -0.687353 | -1.965434 | -2.946931 |
| 18 | 6 | 0 | 0.596704  | -1.307650 | -2.451279 |
| 19 | 1 | 0 | -1.387165 | -3.163499 | 4.617662  |
| 20 | 1 | 0 | 0.286024  | -3.480216 | 4.164653  |
| 21 | 1 | 0 | -0.127092 | -2.008806 | 5.046748  |
| 22 | 1 | 0 | -1.451765 | -1.195157 | 3.066340  |
| 23 | 1 | 0 | -1.039096 | -2.664069 | 2.185408  |
| 24 | 1 | 0 | 1.368586  | -2.053961 | 2.284465  |
| 25 | 1 | 0 | 0.953795  | -0.575844 | 3.170698  |
| 26 | 1 | 0 | 0.871149  | 5.852148  | 0.000000  |

**Tri-*n*-butyl isocyanurate (C<sub>3</sub>) E(PB3AVT) = -978.301982362**

|    |   |   |           |           |           |
|----|---|---|-----------|-----------|-----------|
| 1  | 7 | 0 | 0.093361  | 1.354448  | -1.286632 |
| 2  | 6 | 0 | -1.176078 | 0.792590  | -1.282171 |
| 3  | 7 | 0 | -1.219667 | -0.596372 | -1.286632 |
| 4  | 6 | 0 | -0.098364 | -1.414808 | -1.282171 |
| 5  | 7 | 0 | 1.126306  | -0.758077 | -1.286632 |
| 6  | 6 | 0 | 1.274442  | 0.622218  | -1.282171 |
| 7  | 8 | 0 | -2.177029 | 1.477079  | -1.268300 |
| 8  | 8 | 0 | -0.190674 | -2.623902 | -1.268300 |
| 9  | 8 | 0 | 2.367702  | 1.146822  | -1.268300 |
| 10 | 6 | 0 | 0.625426  | 3.322826  | 2.679441  |
| 11 | 6 | 0 | 0.898722  | 2.770727  | 1.281962  |
| 12 | 6 | 0 | -0.071474 | 3.325157  | 0.238193  |
| 13 | 6 | 0 | 0.178439  | 2.825453  | -1.184325 |
| 14 | 6 | 0 | -3.190365 | -1.119778 | 2.679441  |
| 15 | 6 | 0 | -2.848881 | -0.607047 | 1.281962  |
| 16 | 6 | 0 | -2.843933 | -1.724477 | 0.238193  |
| 17 | 6 | 0 | -2.536134 | -1.258194 | -1.184325 |
| 18 | 6 | 0 | 2.564938  | -2.203048 | 2.679441  |
| 19 | 6 | 0 | 1.950159  | -2.163680 | 1.281962  |
| 20 | 6 | 0 | 2.915407  | -1.600680 | 0.238193  |
| 21 | 6 | 0 | 2.357695  | -1.567260 | -1.184325 |

|                                                                                  |   |   |           |           |           |    |   |   |           |           |           |
|----------------------------------------------------------------------------------|---|---|-----------|-----------|-----------|----|---|---|-----------|-----------|-----------|
| 22                                                                               | 1 | 0 | 1.318076  | 2.909543  | 3.413604  | 8  | 8 | 0 | 0.260275  | 1.315440  | -2.278800 |
| 23                                                                               | 1 | 0 | 0.728448  | 4.409706  | 2.699736  | 9  | 8 | 0 | 0.260275  | 1.315440  | 2.278800  |
| 24                                                                               | 1 | 0 | -0.388917 | 3.082446  | 3.005020  | 10 | 6 | 0 | 1.133679  | -3.538188 | 4.771826  |
| 25                                                                               | 1 | 0 | 0.822763  | 1.679982  | 1.307510  | 11 | 6 | 0 | -0.034511 | -2.693881 | 4.266079  |
| 26                                                                               | 1 | 0 | 1.925349  | 2.992109  | 0.982248  | 12 | 6 | 0 | 0.274786  | -1.995424 | 2.943129  |
| 27                                                                               | 1 | 0 | 0.000000  | 4.416366  | 0.215855  | 13 | 6 | 0 | -0.900120 | -1.157195 | 2.451292  |
| 28                                                                               | 1 | 0 | -1.098762 | 3.086645  | 0.520261  | 14 | 6 | 0 | 1.133679  | -3.538188 | -4.771826 |
| 29                                                                               | 1 | 0 | 1.172111  | 3.098137  | -1.525068 | 15 | 6 | 0 | -0.034511 | -2.693881 | -4.266079 |
| 30                                                                               | 1 | 0 | -0.561564 | 3.237753  | -1.864944 | 16 | 6 | 0 | 0.274786  | -1.995424 | -2.943129 |
| 31                                                                               | 1 | 0 | -3.178777 | -0.313284 | 3.413604  | 17 | 6 | 0 | -0.900120 | -1.157195 | -2.451292 |
| 32                                                                               | 1 | 0 | -4.183141 | -1.573999 | 2.699736  | 18 | 6 | 0 | -0.415084 | 6.310599  | -0.000000 |
| 33                                                                               | 1 | 0 | -2.475018 | -1.878035 | 3.005020  | 19 | 6 | 0 | 0.597863  | 5.167250  | -0.000000 |
| 34                                                                               | 1 | 0 | -1.866289 | -0.127457 | 1.307510  | 20 | 6 | 0 | -0.067979 | 3.792339  | -0.000000 |
| 35                                                                               | 1 | 0 | -3.553917 | 0.171347  | 0.982248  | 21 | 6 | 0 | 0.955411  | 2.662083  | -0.000000 |
| 36                                                                               | 1 | 0 | -3.824685 | -2.208183 | 0.215855  | 22 | 1 | 0 | 0.892531  | -4.027628 | 5.716166  |
| 37                                                                               | 1 | 0 | -2.123732 | -2.494878 | 0.520261  | 23 | 1 | 0 | 1.396055  | -4.314978 | 4.050837  |
| 38                                                                               | 1 | 0 | -3.269120 | -0.533991 | -1.525068 | 24 | 1 | 0 | 2.020967  | -2.922486 | 4.932132  |
| 39                                                                               | 1 | 0 | -2.523195 | -2.105205 | -1.864944 | 25 | 1 | 0 | -0.297118 | -1.943575 | 5.017675  |
| 40                                                                               | 1 | 0 | 1.860700  | -2.596259 | 3.413604  | 26 | 1 | 0 | -0.917907 | -3.327156 | 4.142010  |
| 41                                                                               | 1 | 0 | 3.454694  | -2.835707 | 2.699736  | 27 | 1 | 0 | 0.521068  | -2.738844 | 2.181196  |
| 42                                                                               | 1 | 0 | 2.863935  | -1.204411 | 3.005020  | 28 | 1 | 0 | 1.145747  | -1.346430 | 3.062712  |
| 43                                                                               | 1 | 0 | 1.043526  | -1.552525 | 1.307510  | 29 | 1 | 0 | -1.145298 | -0.381085 | 3.170921  |
| 44                                                                               | 1 | 0 | 1.628568  | -3.163456 | 0.982248  | 30 | 1 | 0 | -1.773254 | -1.781845 | 2.284645  |
| 45                                                                               | 1 | 0 | 3.824685  | -2.208183 | 0.215855  | 31 | 1 | 0 | 0.892531  | -4.027628 | -5.716166 |
| 46                                                                               | 1 | 0 | 3.222494  | -0.591766 | 0.520261  | 32 | 1 | 0 | 2.020967  | -2.922486 | -4.932132 |
| 47                                                                               | 1 | 0 | 2.097010  | -2.564146 | -1.525068 | 33 | 1 | 0 | 1.396055  | -4.314978 | -4.050837 |
| 48                                                                               | 1 | 0 | 3.084759  | -1.132548 | -1.864944 | 34 | 1 | 0 | -0.917907 | -3.327156 | -4.142010 |
|                                                                                  |   |   |           |           |           | 35 | 1 | 0 | -0.297118 | -1.943575 | -5.017675 |
|                                                                                  |   |   |           |           |           | 36 | 1 | 0 | 1.145747  | -1.346430 | -3.062712 |
|                                                                                  |   |   |           |           |           | 37 | 1 | 0 | 0.521068  | -2.738844 | -2.181196 |
|                                                                                  |   |   |           |           |           | 38 | 1 | 0 | -1.773254 | -1.781845 | -2.284645 |
|                                                                                  |   |   |           |           |           | 39 | 1 | 0 | -1.145298 | -0.381085 | -3.170921 |
|                                                                                  |   |   |           |           |           | 40 | 1 | 0 | 0.080310  | 7.282232  | -0.000000 |
|                                                                                  |   |   |           |           |           | 41 | 1 | 0 | -1.057989 | 6.263816  | -0.881214 |
|                                                                                  |   |   |           |           |           | 42 | 1 | 0 | -1.057989 | 6.263816  | 0.881214  |
|                                                                                  |   |   |           |           |           | 43 | 1 | 0 | 1.248089  | 5.253438  | 0.875566  |
| <b>Tri-<i>n</i>-butyl isocyanurate (C<sub>3</sub>) (RB3LYP) = -978.300893292</b> |   |   |           |           |           |    |   |   |           |           |           |
| 1                                                                                | 7 | 0 | -0.605857 | -0.481105 | 1.175030  |    |   |   |           |           |           |
| 2                                                                                | 6 | 0 | -0.878388 | -1.169629 | 0.000000  |    |   |   |           |           |           |
| 3                                                                                | 7 | 0 | -0.605857 | -0.481105 | -1.175030 |    |   |   |           |           |           |
| 4                                                                                | 6 | 0 | 0.006562  | 0.764372  | -1.228407 |    |   |   |           |           |           |
| 5                                                                                | 7 | 0 | 0.316692  | 1.333668  | -0.000000 |    |   |   |           |           |           |
| 6                                                                                | 6 | 0 | 0.006562  | 0.764372  | 1.228407  |    |   |   |           |           |           |
| 7                                                                                | 8 | 0 | -1.339009 | -2.291705 | 0.000000  |    |   |   |           |           |           |

|                                                                                   |   |   |           |           |           |    |   |   |           |           |           |
|-----------------------------------------------------------------------------------|---|---|-----------|-----------|-----------|----|---|---|-----------|-----------|-----------|
| 44                                                                                | 1 | 0 | 1.248089  | 5.253438  | -0.875566 | 30 | 1 | 0 | -2.361253 | 3.561098  | -0.685742 |
| 45                                                                                | 1 | 0 | -0.706160 | 3.690593  | -0.881136 | 31 | 1 | 0 | -2.663772 | 1.837820  | -0.588023 |
| 46                                                                                | 1 | 0 | -0.706160 | 3.690593  | 0.881136  | 32 | 1 | 0 | -0.285146 | 1.468098  | 0.136426  |
| 47                                                                                | 1 | 0 | 1.581672  | 2.712230  | 0.886342  | 33 | 1 | 0 | 0.000000  | 3.189250  | 0.080865  |
| 48                                                                                | 1 | 0 | 1.581672  | 2.712230  | -0.886342 | 34 | 1 | 0 | -1.743209 | 3.515818  | 1.859634  |
|                                                                                   |   |   |           |           |           | 35 | 1 | 0 | -2.079662 | 1.799297  | 1.843495  |
| <b>Tri-<i>n</i>-hexyl isocyanurate (C<sub>3</sub>) E(RB3LYP) = -1214.29375648</b> |   |   |           |           |           |    |   |   |           |           |           |
| 1                                                                                 | 7 | 0 | -0.677613 | 1.177286  | -2.448513 | 36 | 1 | 0 | 0.297955  | 1.347544  | 2.533561  |
| 2                                                                                 | 6 | 0 | 0.711666  | 1.226158  | -2.440486 | 37 | 1 | 0 | 0.589460  | 3.066385  | 2.616718  |
| 3                                                                                 | 7 | 0 | 1.358366  | -0.001813 | -2.448513 | 38 | 1 | 0 | 0.093663  | 2.145790  | 4.889008  |
| 4                                                                                 | 6 | 0 | 0.706051  | -1.229400 | -2.440486 | 39 | 1 | 0 | -1.177738 | 3.271614  | 4.412458  |
| 5                                                                                 | 7 | 0 | -0.680753 | -1.175473 | -2.448513 | 40 | 1 | 0 | -1.456551 | 1.534030  | 4.317591  |
| 6                                                                                 | 6 | 0 | -1.417717 | 0.003242  | -2.440486 | 41 | 1 | 0 | 3.175594  | -0.976062 | -2.507760 |
| 7                                                                                 | 8 | 0 | 1.327796  | 2.270246  | -2.412321 | 42 | 1 | 0 | 3.244458  | 0.748673  | -2.906467 |
| 8                                                                                 | 8 | 0 | 1.302193  | -2.285028 | -2.412321 | 43 | 1 | 0 | 4.264628  | 0.264356  | -0.685742 |
| 9                                                                                 | 8 | 0 | -2.629988 | 0.014782  | -2.412321 | 44 | 1 | 0 | 2.923485  | 1.387984  | -0.588023 |
| 10                                                                                | 6 | 0 | -1.419091 | 2.436570  | -2.231421 | 45 | 1 | 0 | 1.413983  | -0.487105 | 0.136426  |
| 11                                                                                | 6 | 0 | -1.887925 | 2.580194  | -0.780589 | 46 | 1 | 0 | 2.761972  | -1.594625 | 0.080865  |
| 12                                                                                | 6 | 0 | -0.774964 | 2.439165  | 0.258333  | 47 | 1 | 0 | 3.916392  | -0.248245 | 1.859634  |
| 13                                                                                | 6 | 0 | -1.283553 | 2.535962  | 1.695080  | 48 | 1 | 0 | 2.598068  | 0.901391  | 1.843495  |
| 14                                                                                | 6 | 0 | -0.187722 | 2.305625  | 2.735085  | 49 | 1 | 0 | 1.018030  | -0.931809 | 2.533561  |
| 15                                                                                | 6 | 0 | -0.708872 | 2.315816  | 4.170066  | 50 | 1 | 0 | 2.360837  | -2.043680 | 2.616718  |
| 16                                                                                | 6 | 0 | 2.819677  | 0.010683  | -2.231421 | 51 | 1 | 0 | 1.811478  | -1.154009 | 4.889008  |
| 17                                                                                | 6 | 0 | 3.178476  | 0.344894  | -0.780589 | 52 | 1 | 0 | 3.422170  | -0.615856 | 4.412458  |
| 18                                                                                | 6 | 0 | 2.499861  | -0.548444 | 0.258333  | 53 | 1 | 0 | 2.056785  | 0.494396  | 4.317591  |
| 19                                                                                | 6 | 0 | 2.837984  | -0.156391 | 1.695080  | 54 | 1 | 0 | -2.433092 | -2.262114 | -2.507760 |
| 20                                                                                | 6 | 0 | 2.090591  | -0.990240 | 2.735085  | 55 | 1 | 0 | -0.973859 | -3.184119 | -2.906467 |
| 21                                                                                | 6 | 0 | 2.359992  | -0.544007 | 4.170066  | 56 | 1 | 0 | -1.903375 | -3.825454 | -0.685742 |
| 22                                                                                | 6 | 0 | -1.400587 | -2.447254 | -2.231421 | 57 | 1 | 0 | -0.259713 | -3.225805 | -0.588023 |
| 23                                                                                | 6 | 0 | -1.290551 | -2.925088 | -0.780589 | 58 | 1 | 0 | -1.128837 | -0.980993 | 0.136426  |
| 24                                                                                | 6 | 0 | -1.724896 | -1.890721 | 0.258333  | 59 | 1 | 0 | -2.761972 | -1.594625 | 0.080865  |
| 25                                                                                | 6 | 0 | -1.554431 | -2.379571 | 1.695080  | 60 | 1 | 0 | -2.173183 | -3.267572 | 1.859634  |
| 26                                                                                | 6 | 0 | -1.902869 | -1.315385 | 2.735085  | 61 | 1 | 0 | -0.518406 | -2.700688 | 1.843495  |
| 27                                                                                | 6 | 0 | -1.651120 | -1.771809 | 4.170066  | 62 | 1 | 0 | -1.315985 | -0.415736 | 2.533561  |
| 28                                                                                | 1 | 0 | -0.742502 | 3.238176  | -2.507760 | 63 | 1 | 0 | -2.950297 | -1.022705 | 2.616718  |
| 29                                                                                | 1 | 0 | -2.270599 | 2.435446  | -2.906467 | 64 | 1 | 0 | -1.905140 | -0.991781 | 4.889008  |
|                                                                                   |   |   |           |           |           | 65 | 1 | 0 | -2.244432 | -2.655758 | 4.412458  |

|                                                                                   |   |   |           |           |           |                                                                                   |   |   |           |           |           |
|-----------------------------------------------------------------------------------|---|---|-----------|-----------|-----------|-----------------------------------------------------------------------------------|---|---|-----------|-----------|-----------|
| 66                                                                                | 1 | 0 | -0.600233 | -2.028426 | 4.317591  | 34                                                                                | 1 | 0 | 0.691242  | 6.401006  | 0.874993  |
|                                                                                   |   |   |           |           |           | 35                                                                                | 1 | 0 | 0.691242  | 6.401006  | -0.874993 |
| <b>Tri-<i>n</i>-hexyl isocyanurate (C<sub>6</sub>) E(RB3LYP) = -1214.28453811</b> |   |   |           |           |           | 36                                                                                | 1 | 0 | -1.401906 | 7.775443  | -0.874468 |
| 1                                                                                 | 7 | 0 | -0.240161 | 1.402358  | 0.000000  | 37                                                                                | 1 | 0 | -1.401906 | 7.775443  | 0.874468  |
| 2                                                                                 | 6 | 0 | 0.119572  | 0.863022  | 1.228371  | 38                                                                                | 1 | 0 | -0.417380 | 9.901311  | 0.000000  |
| 3                                                                                 | 7 | 0 | 0.840874  | -0.322717 | 1.175019  | 39                                                                                | 1 | 0 | 0.806901  | 8.987983  | 0.880841  |
| 4                                                                                 | 6 | 0 | 1.173700  | -0.984149 | -0.000000 | 40                                                                                | 1 | 0 | 0.806901  | 8.987983  | -0.880841 |
| 5                                                                                 | 7 | 0 | 0.840874  | -0.322717 | -1.175019 | 41                                                                                | 1 | 0 | 2.119116  | -1.514400 | 2.285064  |
| 6                                                                                 | 6 | 0 | 0.119572  | 0.863022  | -1.228371 | 42                                                                                | 1 | 0 | 1.367796  | -0.175832 | 3.171405  |
| 7                                                                                 | 8 | 0 | -0.182459 | 1.389185  | 2.278801  | 43                                                                                | 1 | 0 | -0.827269 | -1.341541 | 3.060749  |
| 8                                                                                 | 8 | 0 | 1.732575  | -2.060719 | -0.000000 | 44                                                                                | 1 | 0 | -0.080248 | -2.671838 | 2.178626  |
| 9                                                                                 | 8 | 0 | -0.182459 | 1.389185  | -2.278801 | 45                                                                                | 1 | 0 | 1.405594  | -3.131616 | 4.141182  |
| 10                                                                                | 6 | 0 | -0.994917 | 2.668523  | 0.000000  | 46                                                                                | 1 | 0 | 0.662894  | -1.809229 | 5.017934  |
| 11                                                                                | 6 | 0 | -0.076391 | 3.885527  | 0.000000  | 47                                                                                | 1 | 0 | -1.550762 | -2.975022 | 4.899088  |
| 12                                                                                | 6 | 0 | -0.863170 | 5.194406  | 0.000000  | 48                                                                                | 1 | 0 | -0.808822 | -4.295905 | 4.023139  |
| 13                                                                                | 6 | 0 | 0.033537  | 6.431526  | 0.000000  | 49                                                                                | 1 | 0 | 0.686011  | -4.752846 | 5.979413  |
| 14                                                                                | 6 | 0 | -0.744805 | 7.746818  | 0.000000  | 50                                                                                | 1 | 0 | -0.055513 | -3.432794 | 6.854833  |
| 15                                                                                | 6 | 0 | 0.161414  | 8.976647  | 0.000000  | 51                                                                                | 1 | 0 | -1.057605 | -5.615695 | 7.550584  |
| 16                                                                                | 6 | 0 | 1.193533  | -0.970394 | 2.451288  | 52                                                                                | 1 | 0 | -2.279088 | -4.614741 | 6.766387  |
| 17                                                                                | 6 | 0 | 0.097824  | -1.910542 | 2.941679  | 53                                                                                | 1 | 0 | -1.532170 | -5.944419 | 5.884563  |
| 18                                                                                | 6 | 0 | 0.468462  | -2.578864 | 4.263842  | 54                                                                                | 1 | 0 | 1.367796  | -0.175832 | -3.171405 |
| 19                                                                                | 6 | 0 | -0.613068 | -3.527565 | 4.778436  | 55                                                                                | 1 | 0 | 2.119116  | -1.514400 | -2.285064 |
| 20                                                                                | 6 | 0 | -0.251396 | -4.201791 | 6.101468  | 56                                                                                | 1 | 0 | -0.080248 | -2.671838 | -2.178626 |
| 21                                                                                | 6 | 0 | -1.339466 | -5.147801 | 6.606322  | 57                                                                                | 1 | 0 | -0.827269 | -1.341541 | -3.060749 |
| 22                                                                                | 6 | 0 | 1.193533  | -0.970394 | -2.451288 | 58                                                                                | 1 | 0 | 0.662894  | -1.809229 | -5.017934 |
| 23                                                                                | 6 | 0 | 0.097824  | -1.910542 | -2.941679 | 59                                                                                | 1 | 0 | 1.405594  | -3.131616 | -4.141182 |
| 24                                                                                | 6 | 0 | 0.468462  | -2.578864 | -4.263842 | 60                                                                                | 1 | 0 | -0.808822 | -4.295905 | -4.023139 |
| 25                                                                                | 6 | 0 | -0.613068 | -3.527565 | -4.778436 | 61                                                                                | 1 | 0 | -1.550762 | -2.975022 | -4.899088 |
| 26                                                                                | 6 | 0 | -0.251396 | -4.201791 | -6.101468 | 62                                                                                | 1 | 0 | -0.055513 | -3.432794 | -6.854833 |
| 27                                                                                | 6 | 0 | -1.339466 | -5.147801 | -6.606322 | 63                                                                                | 1 | 0 | 0.686011  | -4.752846 | -5.979413 |
| 28                                                                                | 1 | 0 | -1.623133 | 2.662584  | -0.886323 | 64                                                                                | 1 | 0 | -1.057605 | -5.615695 | -7.550584 |
| 29                                                                                | 1 | 0 | -1.623133 | 2.662584  | 0.886323  | 65                                                                                | 1 | 0 | -1.532170 | -5.944419 | -5.884563 |
| 30                                                                                | 1 | 0 | 0.568054  | 3.840435  | 0.881101  | 66                                                                                | 1 | 0 | -2.279088 | -4.614741 | -6.766387 |
| 31                                                                                | 1 | 0 | 0.568054  | 3.840435  | -0.881101 |                                                                                   |   |   |           |           |           |
| 32                                                                                | 1 | 0 | -1.519453 | 5.223654  | -0.875926 | <b>Tri-<i>n</i>-octyl isocyanurate (C<sub>8</sub>) E(RB3LYP) = -1450.28356961</b> |   |   |           |           |           |
| 33                                                                                | 1 | 0 | -1.519453 | 5.223654  | 0.875926  | 1                                                                                 | 7 | 0 | 0.063304  | 1.356432  | 3.578662  |

|    |   |   |           |           |           |    |   |   |           |           |           |
|----|---|---|-----------|-----------|-----------|----|---|---|-----------|-----------|-----------|
| 2  | 6 | 0 | -1.194049 | 0.764067  | 3.569901  | 38 | 1 | 0 | -0.602704 | 3.777148  | -3.150282 |
| 3  | 7 | 0 | -1.206357 | -0.623393 | 3.578662  | 39 | 1 | 0 | 0.633414  | 2.541783  | -3.167276 |
| 4  | 6 | 0 | -0.064677 | -1.416111 | 3.569901  | 40 | 1 | 0 | -2.371301 | -2.322435 | 3.658819  |
| 5  | 7 | 0 | 1.143053  | -0.733039 | 3.578662  | 41 | 1 | 0 | -3.217469 | -0.822230 | 4.072992  |
| 6  | 6 | 0 | 1.258726  | 0.652043  | 3.569901  | 42 | 1 | 0 | -3.937076 | -1.734220 | 1.867280  |
| 7  | 8 | 0 | -2.220199 | 1.409905  | 3.543363  | 43 | 1 | 0 | -3.282587 | -0.112306 | 1.756999  |
| 8  | 8 | 0 | -0.110914 | -2.627701 | 3.543363  | 44 | 1 | 0 | -1.097463 | -1.037575 | 0.961011  |
| 9  | 8 | 0 | 2.331113  | 1.217796  | 3.543363  | 45 | 1 | 0 | -1.732211 | -2.661082 | 1.072579  |
| 10 | 6 | 0 | 0.146068  | 2.818183  | 3.384639  | 46 | 1 | 0 | -3.463943 | -2.091826 | -0.644732 |
| 11 | 6 | 0 | 0.508672  | 3.186857  | 1.944054  | 47 | 1 | 0 | -2.878853 | -0.443499 | -0.696399 |
| 12 | 6 | 0 | -0.396582 | 2.560050  | 0.882816  | 48 | 1 | 0 | -0.667450 | -1.230460 | -1.523183 |
| 13 | 6 | 0 | 0.000000  | 2.959226  | -0.536644 | 49 | 1 | 0 | -1.211850 | -2.889665 | -1.454749 |
| 14 | 6 | 0 | -0.835780 | 2.278944  | -1.619022 | 50 | 1 | 0 | -2.969754 | -2.410531 | -3.150282 |
| 15 | 6 | 0 | -0.441129 | 2.700520  | -3.033416 | 51 | 1 | 0 | -2.517956 | -0.722339 | -3.167276 |
| 16 | 6 | 0 | -2.513652 | -1.282592 | 3.384639  | 52 | 1 | 0 | 3.196938  | -0.892390 | 3.658819  |
| 17 | 6 | 0 | -3.014235 | -1.152905 | 1.944054  | 53 | 1 | 0 | 2.320807  | -2.375295 | 4.072992  |
| 18 | 6 | 0 | -2.018777 | -1.623475 | 0.882816  | 54 | 1 | 0 | 3.470416  | -2.542498 | 1.867280  |
| 19 | 6 | 0 | -2.562765 | -1.479613 | -0.536644 | 55 | 1 | 0 | 1.738554  | -2.786651 | 1.756999  |
| 20 | 6 | 0 | -1.555734 | -1.863278 | -1.619022 | 56 | 1 | 0 | 1.447297  | -0.431643 | 0.961011  |
| 21 | 6 | 0 | -2.118155 | -1.732289 | -3.033416 | 57 | 1 | 0 | 3.170670  | -0.169597 | 1.072579  |
| 22 | 6 | 0 | 2.367584  | -1.535590 | 3.384639  | 58 | 1 | 0 | 3.543546  | -1.953950 | -0.644732 |
| 23 | 6 | 0 | 2.505563  | -2.033952 | 1.944054  | 59 | 1 | 0 | 1.823508  | -2.271410 | -0.696399 |
| 24 | 6 | 0 | 2.415359  | -0.936575 | 0.882816  | 60 | 1 | 0 | 1.399334  | 0.037201  | -1.523183 |
| 25 | 6 | 0 | 2.562765  | -1.479613 | -0.536644 | 61 | 1 | 0 | 3.108449  | 0.395340  | -1.454749 |
| 26 | 6 | 0 | 2.391513  | -0.415666 | -1.619022 | 62 | 1 | 0 | 3.572458  | -1.366617 | -3.150282 |
| 27 | 6 | 0 | 2.559284  | -0.968231 | -3.033416 | 63 | 1 | 0 | 1.884542  | -1.819445 | -3.167276 |
| 28 | 1 | 0 | -0.825637 | 3.214824  | 3.658819  | 64 | 6 | 0 | -1.197700 | 1.951239  | -4.128454 |
| 29 | 1 | 0 | 0.896663  | 3.197525  | 4.072992  | 65 | 1 | 0 | -1.051938 | 0.878037  | -3.989623 |
| 30 | 1 | 0 | 0.466659  | 4.276717  | 1.867280  | 66 | 1 | 0 | -2.271556 | 2.126074  | -4.012446 |
| 31 | 1 | 0 | 1.544034  | 2.898957  | 1.756999  | 67 | 6 | 0 | -0.759277 | 2.341365  | -5.538071 |
| 32 | 1 | 0 | -0.349835 | 1.469218  | 0.961011  | 68 | 1 | 0 | 0.303187  | 2.137309  | -5.685487 |
| 33 | 1 | 0 | -1.438459 | 2.830679  | 1.072579  | 69 | 1 | 0 | -1.311312 | 1.785519  | -6.297292 |
| 34 | 1 | 0 | -0.079603 | 4.045776  | -0.644732 | 70 | 1 | 0 | -0.919397 | 3.405933  | -5.720572 |
| 35 | 1 | 0 | 1.055345  | 2.714910  | -0.696399 | 71 | 6 | 0 | -1.090972 | -2.012858 | -4.128454 |
| 36 | 1 | 0 | -0.731884 | 1.193259  | -1.523183 | 72 | 1 | 0 | -0.234434 | -1.350023 | -3.989623 |
| 37 | 1 | 0 | -1.896599 | 2.494326  | -1.454749 | 73 | 1 | 0 | -0.705456 | -3.030262 | -4.012446 |

|    |   |   |           |           |           |    |   |   |           |           |          |
|----|---|---|-----------|-----------|-----------|----|---|---|-----------|-----------|----------|
| 74 | 6 | 0 | -1.648043 | -1.828236 | -5.538071 | 24 | 6 | 0 | -0.910746 | 5.263810  | 0.000000 |
| 75 | 1 | 0 | -2.002558 | -0.806087 | -5.685487 | 25 | 6 | 0 | -0.074164 | 6.542496  | 0.000000 |
| 76 | 1 | 0 | -0.890649 | -2.028389 | -6.297292 | 26 | 6 | 0 | -0.915394 | 7.817963  | 0.000000 |
| 77 | 1 | 0 | -2.489926 | -2.499187 | -5.720572 | 27 | 6 | 0 | -0.080095 | 9.097294  | 0.000000 |
| 78 | 6 | 0 | 2.288672  | 0.061619  | -4.128454 | 28 | 1 | 0 | 2.388662  | -1.295158 | 2.285292 |
| 79 | 1 | 0 | 1.286371  | 0.471986  | -3.989623 | 29 | 1 | 0 | 1.574304  | 0.006023  | 3.171629 |
| 80 | 1 | 0 | 2.977012  | 0.904188  | -4.012446 | 30 | 1 | 0 | -0.562879 | -1.262527 | 3.059929 |
| 81 | 6 | 0 | 2.407320  | -0.513129 | -5.538071 | 31 | 1 | 0 | 0.246711  | -2.555654 | 2.177761 |
| 82 | 1 | 0 | 2.201961  | 0.242869  | -6.297292 | 32 | 1 | 0 | 1.751746  | -2.945222 | 4.140854 |
| 83 | 1 | 0 | 3.409323  | -0.906745 | -5.720572 | 33 | 1 | 0 | 0.947070  | -1.659702 | 5.017610 |
| 84 | 1 | 0 | 1.699370  | -1.331223 | -5.685487 | 34 | 1 | 0 | -1.208720 | -2.928110 | 4.896918 |

**Tri-*n*-octyl isocyanurate (C<sub>8</sub>) E(RB3LYP) = -1450.26787905**

|    |   |   |           |           |           |    |   |   |           |           |           |
|----|---|---|-----------|-----------|-----------|----|---|---|-----------|-----------|-----------|
| 1  | 7 | 0 | 1.055576  | -0.165353 | 1.175021  | 36 | 1 | 0 | 1.110117  | -4.599554 | 5.979008  |
| 2  | 6 | 0 | 1.419715  | -0.810074 | 0.000000  | 37 | 1 | 0 | 0.306616  | -3.315617 | 6.854896  |
| 3  | 7 | 0 | 1.055576  | -0.165353 | -1.175021 | 38 | 1 | 0 | -1.851615 | -4.584531 | 6.734926  |
| 4  | 6 | 0 | 0.278256  | 0.984435  | -1.228361 | 39 | 1 | 0 | -1.048299 | -5.868279 | 5.859088  |
| 5  | 7 | 0 | -0.106877 | 1.505934  | 0.000000  | 40 | 1 | 0 | 1.574304  | 0.006023  | -3.171629 |
| 6  | 6 | 0 | 0.278256  | 0.984435  | 1.228361  | 41 | 1 | 0 | 2.388662  | -1.295158 | -2.285292 |
| 7  | 8 | 0 | 2.029500  | -1.858658 | 0.000000  | 42 | 1 | 0 | 0.246711  | -2.555654 | -2.177761 |
| 8  | 8 | 0 | -0.048705 | 1.495486  | -2.278800 | 43 | 1 | 0 | -0.562879 | -1.262527 | -3.059929 |
| 9  | 8 | 0 | -0.048705 | 1.495486  | 2.278800  | 44 | 1 | 0 | 0.947070  | -1.659702 | -5.017610 |
| 10 | 6 | 0 | 1.438225  | -0.795777 | 2.451308  | 45 | 1 | 0 | 1.751746  | -2.945222 | -4.140854 |
| 11 | 6 | 0 | 0.388215  | -1.786980 | 2.941088  | 46 | 1 | 0 | -0.404959 | -4.212164 | -4.020909 |
| 12 | 6 | 0 | 0.789514  | -2.437388 | 4.263197  | 47 | 1 | 0 | -1.208720 | -2.928110 | -4.896918 |
| 13 | 6 | 0 | -0.246375 | -3.436313 | 4.776998  | 48 | 1 | 0 | 0.306616  | -3.315617 | -6.854896 |
| 14 | 6 | 0 | 0.147031  | -4.092380 | 6.099602  | 49 | 1 | 0 | 1.110117  | -4.599554 | -5.979008 |
| 15 | 6 | 0 | -0.888122 | -5.091332 | 6.614344  | 50 | 1 | 0 | -1.048299 | -5.868279 | -5.859088 |
| 16 | 6 | 0 | 1.438225  | -0.795777 | -2.451308 | 51 | 1 | 0 | -1.851615 | -4.584531 | -6.734926 |
| 17 | 6 | 0 | 0.388215  | -1.786980 | -2.941088 | 52 | 1 | 0 | -1.548590 | 2.698510  | -0.886322 |
| 18 | 6 | 0 | 0.789514  | -2.437388 | -4.263197 | 53 | 1 | 0 | -1.548590 | 2.698510  | 0.886322  |
| 19 | 6 | 0 | -0.246375 | -3.436313 | -4.776998 | 54 | 1 | 0 | 0.583664  | 3.979965  | 0.881098  |
| 20 | 6 | 0 | 0.147031  | -4.092380 | -6.099602 | 55 | 1 | 0 | 0.583664  | 3.979965  | -0.881098 |
| 21 | 6 | 0 | -0.888122 | -5.091332 | -6.614344 | 56 | 1 | 0 | -1.567697 | 5.261661  | -0.875889 |
| 22 | 6 | 0 | -0.921377 | 2.734531  | 0.000000  | 57 | 1 | 0 | -1.567697 | 5.261661  | 0.875889  |
| 23 | 6 | 0 | -0.062217 | 3.994127  | 0.000000  | 58 | 1 | 0 | 0.584012  | 6.542686  | 0.874957  |
|    |   |   |           |           |           | 59 | 1 | 0 | 0.584012  | 6.542686  | -0.874957 |

|    |   |   |           |           |           |
|----|---|---|-----------|-----------|-----------|
| 60 | 1 | 0 | -1.574166 | 7.816349  | -0.874829 |
| 61 | 1 | 0 | -1.574166 | 7.816349  | 0.874829  |
| 62 | 1 | 0 | 0.579144  | 9.099257  | 0.874701  |
| 63 | 1 | 0 | 0.579144  | 9.099257  | -0.874701 |
| 64 | 6 | 0 | -0.496833 | -5.749124 | 7.937371  |
| 65 | 1 | 0 | 0.465592  | -6.255490 | 7.815920  |
| 66 | 1 | 0 | -0.337310 | -4.972292 | 8.691360  |
| 67 | 6 | 0 | -1.539347 | -6.745479 | 8.441673  |
| 68 | 1 | 0 | -1.694323 | -7.549952 | 7.719471  |
| 69 | 1 | 0 | -1.236507 | -7.200215 | 9.385962  |
| 70 | 1 | 0 | -2.503151 | -6.257274 | 8.601372  |
| 71 | 6 | 0 | -0.496833 | -5.749124 | -7.937371 |
| 72 | 1 | 0 | -0.337310 | -4.972292 | -8.691360 |
| 73 | 1 | 0 | 0.465592  | -6.255490 | -7.815920 |
| 74 | 6 | 0 | -1.539347 | -6.745479 | -8.441673 |
| 75 | 1 | 0 | -2.503151 | -6.257274 | -8.601372 |
| 76 | 1 | 0 | -1.236507 | -7.200215 | -9.385962 |
| 77 | 1 | 0 | -1.694323 | -7.549952 | -7.719471 |
| 78 | 6 | 0 | -0.919492 | 10.374637 | 0.000000  |
| 79 | 1 | 0 | -1.577520 | 10.372002 | -0.874308 |
| 80 | 1 | 0 | -1.577520 | 10.372002 | 0.874308  |
| 81 | 6 | 0 | -0.073466 | 11.646692 | 0.000000  |
| 82 | 1 | 0 | -0.695639 | 12.542840 | 0.000000  |
| 83 | 1 | 0 | 0.570928  | 11.688916 | 0.880761  |
| 84 | 1 | 0 | 0.570928  | 11.688916 | -0.880761 |

**Tri-*i*-propyl isocyanurate (C<sub>36</sub>) E(RB3LYP) = -860.305801320**

|   |   |   |           |           |          |
|---|---|---|-----------|-----------|----------|
| 1 | 7 | 0 | 1.344802  | -0.226346 | 0.000000 |
| 2 | 6 | 0 | 0.489763  | -1.330156 | 0.000000 |
| 3 | 7 | 0 | -0.868422 | -1.051459 | 0.000000 |
| 4 | 6 | 0 | -1.396830 | 0.240930  | 0.000000 |
| 5 | 7 | 0 | -0.476379 | 1.277805  | 0.000000 |
| 6 | 6 | 0 | 0.907067  | 1.089225  | 0.000000 |
| 7 | 8 | 0 | 0.910495  | -2.468478 | 0.000000 |
| 8 | 8 | 0 | -2.593013 | 0.445727  | 0.000000 |
| 9 | 8 | 0 | 1.682517  | 2.022751  | 0.000000 |

|    |   |   |           |           |           |
|----|---|---|-----------|-----------|-----------|
| 10 | 6 | 0 | 2.815791  | -0.503784 | 0.000000  |
| 11 | 6 | 0 | 3.482838  | 0.000000  | 1.277850  |
| 12 | 6 | 0 | 3.482838  | 0.000000  | -1.277850 |
| 13 | 6 | 0 | -1.844185 | -2.186655 | 0.000000  |
| 14 | 6 | 0 | -1.741419 | -3.016226 | 1.277850  |
| 15 | 6 | 0 | -1.741419 | -3.016226 | -1.277850 |
| 16 | 6 | 0 | -0.971606 | 2.690439  | 0.000000  |
| 17 | 6 | 0 | -1.741419 | 3.016226  | 1.277850  |
| 18 | 6 | 0 | -1.741419 | 3.016226  | -1.277850 |
| 19 | 1 | 0 | 2.860086  | -1.587257 | 0.000000  |
| 20 | 1 | 0 | 2.975395  | -0.395598 | 2.158383  |
| 21 | 1 | 0 | 4.514793  | -0.351899 | 1.300218  |
| 22 | 1 | 0 | 3.484819  | 1.085446  | 1.328181  |
| 23 | 1 | 0 | 2.975395  | -0.395598 | -2.158383 |
| 24 | 1 | 0 | 4.514793  | -0.351899 | -1.300218 |
| 25 | 1 | 0 | 3.484819  | 1.085446  | -1.328181 |
| 26 | 1 | 0 | -2.804648 | -1.683279 | 0.000000  |
| 27 | 1 | 0 | -1.830295 | -2.378969 | 2.158383  |
| 28 | 1 | 0 | -2.562150 | -3.733976 | 1.300218  |
| 29 | 1 | 0 | -0.802385 | -3.560665 | 1.328181  |
| 30 | 1 | 0 | -1.830295 | -2.378969 | -2.158383 |
| 31 | 1 | 0 | -2.562150 | -3.733976 | -1.300218 |
| 32 | 1 | 0 | -0.802385 | -3.560665 | -1.328181 |
| 33 | 1 | 0 | -0.055438 | 3.270536  | 0.000000  |
| 34 | 1 | 0 | -1.145100 | 2.774567  | 2.158383  |
| 35 | 1 | 0 | -1.952643 | 4.085875  | 1.300218  |
| 36 | 1 | 0 | -2.682433 | 2.475218  | 1.328181  |
| 37 | 1 | 0 | -1.145100 | 2.774567  | -2.158383 |
| 38 | 1 | 0 | -1.952643 | 4.085875  | -1.300218 |
| 39 | 1 | 0 | -2.682433 | 2.475218  | -1.328181 |

**Tri-*i*-propyl isocyanurate (C<sub>3</sub>) E(RB3LYP) = -860.305695683**

|   |   |   |           |           |          |
|---|---|---|-----------|-----------|----------|
| 1 | 7 | 0 | 1.491644  | -0.071281 | 0.000000 |
| 2 | 6 | 0 | 0.837782  | 1.152811  | 0.000000 |
| 3 | 7 | 0 | -0.556284 | 1.105571  | 0.000000 |
| 4 | 6 | 0 | -1.288247 | -0.074240 | 0.000000 |

|    |   |   |           |           |           |                                           |                    |                       |           |           |           |
|----|---|---|-----------|-----------|-----------|-------------------------------------------|--------------------|-----------------------|-----------|-----------|-----------|
| 5  | 7 | 0 | -0.554562 | -1.254585 | 0.000000  | <b>Tri-<i>t</i>-butyl isocyanurate(C)</b> | <b>E(RB3LYP) =</b> | <b>-978.263023744</b> |           |           |           |
| 6  | 6 | 0 | 0.837480  | -1.302461 | 0.000000  | 1                                         | 7                  | 0                     | 0.029129  | -0.657451 | 1.171900  |
| 7  | 8 | 0 | 1.446248  | 2.202838  | 0.000000  | 2                                         | 6                  | 0                     | 0.619624  | -1.167042 | 0.000000  |
| 8  | 8 | 0 | -2.501810 | -0.075581 | 0.000000  | 3                                         | 7                  | 0                     | 0.029129  | -0.657451 | -1.171900 |
| 9  | 8 | 0 | 1.445444  | -2.352741 | 0.000000  | 4                                         | 6                  | 0                     | -0.248519 | 0.704342  | -1.209139 |
| 10 | 6 | 0 | 2.989241  | -0.094227 | 0.000000  | 5                                         | 7                  | 0                     | -0.011235 | 1.376847  | 0.000000  |
| 11 | 6 | 0 | 3.560857  | 0.515658  | 1.277852  | 6                                         | 6                  | 0                     | -0.248519 | 0.704342  | 1.209139  |
| 12 | 6 | 0 | 3.560857  | 0.515658  | -1.277852 | 7                                         | 8                  | 0                     | 1.507817  | -1.979980 | 0.000000  |
| 13 | 6 | 0 | -1.283804 | 2.413300  | 0.000000  | 8                                         | 8                  | 0                     | -0.621831 | 1.276945  | -2.210703 |
| 14 | 6 | 0 | -2.097988 | 2.603944  | 1.277766  | 9                                         | 8                  | 0                     | -0.621831 | 1.276945  | 2.210703  |
| 15 | 6 | 0 | -2.097988 | 2.603944  | -1.277766 | 10                                        | 6                  | 0                     | -0.114117 | -1.504067 | 2.429058  |
| 16 | 6 | 0 | -1.283689 | -2.562398 | 0.000000  | 11                                        | 6                  | 0                     | 0.954269  | -1.082638 | 3.441313  |
| 17 | 6 | 0 | -2.097988 | -2.752414 | -1.277774 | 12                                        | 6                  | 0                     | 0.034969  | -2.997250 | 2.101741  |
| 18 | 6 | 0 | -2.097988 | -2.752414 | 1.277774  | 13                                        | 6                  | 0                     | -1.535945 | -1.313835 | 2.989507  |
| 19 | 1 | 0 | 3.217520  | -1.154165 | 0.000000  | 14                                        | 6                  | 0                     | -0.114117 | -1.504067 | -2.429058 |
| 20 | 1 | 0 | 3.127613  | 0.040049  | 2.158433  | 15                                        | 6                  | 0                     | 0.034969  | -2.997250 | -2.101741 |
| 21 | 1 | 0 | 4.637443  | 0.343255  | 1.300383  | 16                                        | 6                  | 0                     | 0.954269  | -1.082638 | -3.441313 |
| 22 | 1 | 0 | 3.379321  | 1.585788  | 1.327940  | 17                                        | 6                  | 0                     | -1.535945 | -1.313835 | -2.989507 |
| 23 | 1 | 0 | 3.127613  | 0.040049  | -2.158433 | 18                                        | 6                  | 0                     | 0.170380  | 2.889008  | 0.000000  |
| 24 | 1 | 0 | 4.637443  | 0.343255  | -1.300383 | 19                                        | 6                  | 0                     | -1.201641 | 3.565089  | 0.000000  |
| 25 | 1 | 0 | 3.379321  | 1.585788  | -1.327940 | 20                                        | 6                  | 0                     | 0.996058  | 3.308539  | -1.230665 |
| 26 | 1 | 0 | -0.479463 | 3.140614  | 0.000000  | 21                                        | 6                  | 0                     | 0.996058  | 3.308539  | 1.230665  |
| 27 | 1 | 0 | -1.470054 | 2.464712  | 2.158458  | 22                                        | 1                  | 0                     | 0.839838  | -0.036347 | 3.713799  |
| 28 | 1 | 0 | -2.485873 | 3.622907  | 1.301130  | 23                                        | 1                  | 0                     | 0.862396  | -1.687041 | 4.344459  |
| 29 | 1 | 0 | -2.934675 | 1.912413  | 1.326830  | 24                                        | 1                  | 0                     | 1.948988  | -1.239113 | 3.024363  |
| 30 | 1 | 0 | -1.470054 | 2.464712  | -2.158458 | 25                                        | 1                  | 0                     | -0.638320 | -3.298393 | 1.298416  |
| 31 | 1 | 0 | -2.485873 | 3.622907  | -1.301130 | 26                                        | 1                  | 0                     | -0.244190 | -3.555888 | 2.994108  |
| 32 | 1 | 0 | -2.934675 | 1.912413  | -1.326830 | 27                                        | 1                  | 0                     | 1.045904  | -3.270031 | 1.823992  |
| 33 | 1 | 0 | -0.480248 | -3.290505 | 0.000000  | 28                                        | 1                  | 0                     | -1.665922 | -1.989538 | 3.834664  |
| 34 | 1 | 0 | -1.470164 | -2.612974 | -2.158508 | 29                                        | 1                  | 0                     | -1.717046 | -0.300461 | 3.324455  |
| 35 | 1 | 0 | -2.485561 | -3.771493 | -1.301307 | 30                                        | 1                  | 0                     | -2.277850 | -1.573951 | 2.233225  |
| 36 | 1 | 0 | -2.934848 | -2.061143 | -1.326601 | 31                                        | 1                  | 0                     | -0.638320 | -3.298393 | -1.298416 |
| 37 | 1 | 0 | -1.470164 | -2.612974 | 2.158508  | 32                                        | 1                  | 0                     | -0.244190 | -3.555888 | -2.994108 |
| 38 | 1 | 0 | -2.485561 | -3.771493 | 1.301307  | 33                                        | 1                  | 0                     | 1.045904  | -3.270031 | -1.823992 |
| 39 | 1 | 0 | -2.934848 | -2.061143 | 1.326601  | 34                                        | 1                  | 0                     | 0.839838  | -0.036347 | -3.713799 |
|    |   |   |           |           |           | 35                                        | 1                  | 0                     | 0.862396  | -1.687041 | -4.344459 |



|    |   |   |           |           |           |
|----|---|---|-----------|-----------|-----------|
| 36 | 1 | 0 | 1.948988  | -1.239113 | -3.024363 |
| 37 | 1 | 0 | -1.665922 | -1.989538 | -3.834664 |
| 38 | 1 | 0 | -2.277850 | -1.573951 | -2.233225 |
| 39 | 1 | 0 | -1.717046 | -0.300461 | -3.324455 |
| 40 | 1 | 0 | -1.761944 | 3.279451  | 0.888511  |
| 41 | 1 | 0 | -1.080254 | 4.649162  | 0.000000  |
| 42 | 1 | 0 | -1.761944 | 3.279451  | -0.888511 |
| 43 | 1 | 0 | 1.912732  | 2.720382  | -1.298203 |
| 44 | 1 | 0 | 1.279131  | 4.352637  | -1.104406 |
| 45 | 1 | 0 | 0.449842  | 3.209555  | -2.159589 |
| 46 | 1 | 0 | 1.279131  | 4.352637  | 1.104406  |
| 47 | 1 | 0 | 0.449842  | 3.209555  | 2.159589  |
| 48 | 1 | 0 | 1.912732  | 2.720382  | 1.298203  |

|    |   |   |           |           |           |
|----|---|---|-----------|-----------|-----------|
| 22 | 1 | 0 | 2.159623  | 3.222890  | -0.391797 |
| 23 | 1 | 0 | 1.102471  | 4.394334  | -1.176723 |
| 24 | 1 | 0 | 1.297747  | 2.787497  | -1.871438 |
| 25 | 1 | 0 | -2.159623 | 3.222890  | -0.391797 |
| 26 | 1 | 0 | -1.102471 | 4.394334  | -1.176723 |
| 27 | 1 | 0 | -1.297747 | 2.787497  | -1.871438 |
| 28 | 1 | 0 | 0.000000  | 4.596981  | 1.194202  |
| 29 | 1 | 0 | 0.888486  | 3.203353  | 1.823615  |
| 30 | 1 | 0 | -0.888486 | 3.203353  | 1.823615  |
| 31 | 1 | 0 | -3.870917 | 0.258843  | -0.391797 |
| 32 | 1 | 0 | -4.356840 | -1.242399 | -1.176723 |
| 33 | 1 | 0 | -3.062917 | -0.269866 | -1.871438 |
| 34 | 1 | 0 | -1.711293 | -3.481734 | -0.391797 |
| 35 | 1 | 0 | -3.254369 | -3.151935 | -1.176723 |

**Tri-*t*-butyl isocyanurate(C<sub>3</sub>) E(RB3LYP) = -978.261636690**

|    |   |   |           |           |           |
|----|---|---|-----------|-----------|-----------|
| 1  | 7 | 0 | 0.000000  | 1.367030  | -0.013250 |
| 2  | 6 | 0 | -1.204820 | 0.695603  | 0.227657  |
| 3  | 7 | 0 | -1.183882 | -0.683515 | -0.013250 |
| 4  | 6 | 0 | -0.000000 | -1.391206 | 0.227657  |
| 5  | 7 | 0 | 1.183882  | -0.683515 | -0.013250 |
| 6  | 6 | 0 | 1.204820  | 0.695603  | 0.227657  |
| 7  | 8 | 0 | -2.192745 | 1.265982  | 0.632393  |
| 8  | 8 | 0 | -0.000000 | -2.531964 | 0.632393  |
| 9  | 8 | 0 | 2.192745  | 1.265982  | 0.632393  |
| 10 | 6 | 0 | 0.000000  | 2.888752  | -0.123609 |
| 11 | 6 | 0 | 1.230247  | 3.340566  | -0.933213 |
| 12 | 6 | 0 | -1.230247 | 3.340566  | -0.933213 |
| 13 | 6 | 0 | 0.000000  | 3.509133  | 1.274394  |
| 14 | 6 | 0 | -2.501733 | -1.444376 | -0.123609 |
| 15 | 6 | 0 | -3.508138 | -0.604857 | -0.933213 |
| 16 | 6 | 0 | -2.277891 | -2.735708 | -0.933213 |
| 17 | 6 | 0 | -3.038998 | -1.754567 | 1.274394  |
| 18 | 6 | 0 | 2.501733  | -1.444376 | -0.123609 |
| 19 | 6 | 0 | 3.038998  | -1.754567 | 1.274394  |
| 20 | 6 | 0 | 2.277891  | -2.735708 | -0.933213 |
| 21 | 6 | 0 | 3.508138  | -0.604857 | -0.933213 |

|    |   |   |           |           |           |
|----|---|---|-----------|-----------|-----------|
| 36 | 1 | 0 | -1.765169 | -2.517631 | -1.871438 |
| 37 | 1 | 0 | -3.981102 | -2.298491 | 1.194202  |
| 38 | 1 | 0 | -3.218428 | -0.832225 | 1.823615  |
| 39 | 1 | 0 | -2.329942 | -2.371128 | 1.823615  |
| 40 | 1 | 0 | 3.218428  | -0.832225 | 1.823615  |
| 41 | 1 | 0 | 3.981102  | -2.298491 | 1.194202  |
| 42 | 1 | 0 | 2.329942  | -2.371128 | 1.823615  |
| 43 | 1 | 0 | 1.765169  | -2.517631 | -1.871438 |
| 44 | 1 | 0 | 3.254369  | -3.151935 | -1.176723 |
| 45 | 1 | 0 | 1.711293  | -3.481734 | -0.391797 |
| 46 | 1 | 0 | 4.356840  | -1.242399 | -1.176723 |
| 47 | 1 | 0 | 3.870917  | 0.258843  | -0.391797 |
| 48 | 1 | 0 | 3.062917  | -0.269866 | -1.871438 |

**Tricyclohexyl isocyanurate(C<sub>30</sub>) E(RB3LYP) = -1210.65474074**

|   |   |   |           |           |          |
|---|---|---|-----------|-----------|----------|
| 1 | 7 | 0 | -0.956564 | -0.972888 | 0.000000 |
| 2 | 6 | 0 | 0.384128  | -1.364649 | 0.000000 |
| 3 | 7 | 0 | 1.320827  | -0.341965 | 0.000000 |
| 4 | 6 | 0 | 0.989756  | 1.014989  | 0.000000 |
| 5 | 7 | 0 | -0.364263 | 1.314852  | 0.000000 |
| 6 | 6 | 0 | -1.373885 | 0.349659  | 0.000000 |
| 7 | 8 | 0 | 0.709920  | -2.533697 | 0.000000 |



|    |   |   |           |           |           |
|----|---|---|-----------|-----------|-----------|
| 18 | 6 | 0 | -3.190897 | -1.448382 | 1.157293  |
| 19 | 6 | 0 | -4.394690 | -2.140491 | 1.154248  |
| 20 | 6 | 0 | -4.824700 | -2.785542 | 0.000000  |
| 21 | 6 | 0 | -4.051065 | -2.735667 | -1.154248 |
| 22 | 6 | 0 | -2.849784 | -2.039206 | -1.157293 |
| 23 | 6 | 0 | 2.849784  | -2.039206 | 1.157293  |
| 24 | 6 | 0 | 4.051065  | -2.735667 | 1.154248  |
| 25 | 6 | 0 | 4.824700  | -2.785542 | 0.000000  |
| 26 | 6 | 0 | 4.394690  | -2.140491 | -1.154248 |
| 27 | 6 | 0 | 3.190897  | -1.448382 | -1.157293 |
| 28 | 1 | 0 | 0.612153  | 2.934268  | 2.045115  |
| 29 | 1 | 0 | 0.613554  | 5.413701  | 2.052840  |
| 30 | 1 | 0 | 0.000000  | 6.652638  | 0.000000  |
| 31 | 1 | 0 | -0.613554 | 5.413701  | -2.052840 |
| 32 | 1 | 0 | -0.612153 | 2.934268  | -2.045115 |
| 33 | 1 | 0 | -2.847227 | -0.936994 | 2.045115  |
| 34 | 1 | 0 | -4.995179 | -2.175497 | 2.052840  |
| 35 | 1 | 0 | -5.761353 | -3.326319 | 0.000000  |
| 36 | 1 | 0 | -4.381625 | -3.238204 | -2.052840 |
| 37 | 1 | 0 | -2.235075 | -1.997274 | -2.045115 |
| 38 | 1 | 0 | 2.235075  | -1.997274 | 2.045115  |
| 39 | 1 | 0 | 4.381625  | -3.238204 | 2.052840  |
| 40 | 1 | 0 | 5.761353  | -3.326319 | 0.000000  |
| 41 | 1 | 0 | 4.995179  | -2.175497 | -2.052840 |
| 42 | 1 | 0 | 2.847227  | -0.936994 | -2.045115 |

## The Cartesian coordinates of the optimized isocyanate

**Methyl isocyanate (C<sub>s</sub>) E(RB3LYP) = -208.073147882**

|   |   |   |           |           |           |
|---|---|---|-----------|-----------|-----------|
| 1 | 6 | 0 | 1.340406  | 1.106070  | 0.000000  |
| 2 | 1 | 0 | 1.294021  | 2.192579  | 0.000000  |
| 3 | 1 | 0 | 1.886834  | 0.783661  | 0.887527  |
| 4 | 1 | 0 | 1.886834  | 0.783661  | -0.887527 |
| 5 | 7 | 0 | 0.000000  | 0.579737  | 0.000000  |
| 6 | 6 | 0 | -0.559972 | -0.478178 | 0.000000  |
| 7 | 8 | 0 | -1.218786 | -1.448176 | 0.000000  |

**Ethyl isocyanate (C<sub>s</sub>) E(RB3LYP) = -247.406675331**

|    |   |   |           |           |           |
|----|---|---|-----------|-----------|-----------|
| 1  | 7 | 0 | 0.000000  | 0.285177  | 0.000000  |
| 2  | 6 | 0 | 1.036884  | 0.884473  | 0.000000  |
| 3  | 8 | 0 | 1.983858  | 1.575969  | 0.000000  |
| 4  | 6 | 0 | -1.993988 | -1.129384 | 0.000000  |
| 5  | 6 | 0 | -0.473346 | -1.085150 | 0.000000  |
| 6  | 1 | 0 | -2.338273 | -2.164083 | 0.000000  |
| 7  | 1 | 0 | -2.393856 | -0.631382 | 0.882955  |
| 8  | 1 | 0 | -2.393856 | -0.631382 | -0.882955 |
| 9  | 1 | 0 | -0.081091 | -1.598387 | -0.880924 |
| 10 | 1 | 0 | -0.081091 | -1.598387 | 0.880924  |

***n*-Propyl isocyanate(C<sub>1</sub>) E(RB3LYP) = -286.738234379**

|    |   |   |           |           |           |
|----|---|---|-----------|-----------|-----------|
| 1  | 7 | 0 | 0.671129  | -0.861808 | -0.181283 |
| 2  | 6 | 0 | 1.546077  | -0.056366 | -0.042750 |
| 3  | 8 | 0 | 2.471594  | 0.662654  | 0.011753  |
| 4  | 6 | 0 | -1.514240 | 1.289842  | 0.122337  |
| 5  | 6 | 0 | -1.708662 | -0.164066 | -0.299775 |
| 6  | 6 | 0 | -0.672009 | -1.119652 | 0.293956  |
| 7  | 1 | 0 | -2.295294 | 1.925115  | -0.295613 |
| 8  | 1 | 0 | -1.547516 | 1.391298  | 1.209257  |
| 9  | 1 | 0 | -0.556586 | 1.683129  | -0.220651 |
| 10 | 1 | 0 | -1.680631 | -0.248291 | -1.388271 |
| 11 | 1 | 0 | -2.693591 | -0.515276 | 0.019284  |
| 12 | 1 | 0 | -0.917628 | -2.145448 | 0.022666  |
| 13 | 1 | 0 | -0.686402 | -1.057651 | 1.385691  |

***n*-Butyl isocyanate (C<sub>1</sub>) E(RB3LYP) = -326.068771858**

|    |   |   |           |           |           |
|----|---|---|-----------|-----------|-----------|
| 1  | 7 | 0 | 1.441461  | 0.712698  | -0.247474 |
| 2  | 6 | 0 | 1.963502  | -0.349358 | -0.066737 |
| 3  | 8 | 0 | 2.559335  | -1.356259 | 0.022001  |
| 4  | 6 | 0 | -2.745294 | -0.942492 | -0.128125 |
| 5  | 6 | 0 | -1.376758 | -0.444848 | 0.334087  |
| 6  | 6 | 0 | -1.032484 | 0.932404  | -0.230205 |
| 7  | 6 | 0 | 0.315023  | 1.482214  | 0.238690  |
| 8  | 1 | 0 | -2.970730 | -1.926140 | 0.284851  |
| 9  | 1 | 0 | -3.538568 | -0.259755 | 0.183260  |
| 10 | 1 | 0 | -2.785551 | -1.021167 | -1.216350 |
| 11 | 1 | 0 | -0.612870 | -1.167012 | 0.036430  |
| 12 | 1 | 0 | -1.350046 | -0.401891 | 1.427363  |
| 13 | 1 | 0 | -1.801445 | 1.651322  | 0.068717  |
| 14 | 1 | 0 | -1.040473 | 0.899729  | -1.322789 |
| 15 | 1 | 0 | 0.347450  | 1.517034  | 1.331162  |
| 16 | 1 | 0 | 0.443392  | 2.501549  | -0.122595 |

***n*-hexyl isocyanate (C<sub>1</sub>) E(RB3LYP) = -404.730027282**

|    |   |   |           |           |           |
|----|---|---|-----------|-----------|-----------|
| 1  | 7 | 0 | 2.683294  | -0.256377 | -0.222780 |
| 2  | 6 | 0 | 2.695779  | 0.932969  | -0.087395 |
| 3  | 8 | 0 | 2.803465  | 2.100433  | -0.038491 |
| 4  | 6 | 0 | 1.963584  | -1.412728 | 0.269291  |
| 5  | 6 | 0 | 0.520250  | -1.478996 | -0.231358 |
| 6  | 6 | 0 | -0.373731 | -0.356271 | 0.290591  |
| 7  | 6 | 0 | -1.818108 | -0.466617 | -0.196504 |
| 8  | 6 | 0 | -2.718948 | 0.655931  | 0.317693  |
| 9  | 6 | 0 | -4.159765 | 0.538004  | -0.175838 |
| 10 | 1 | 0 | 2.510130  | -2.294667 | -0.061616 |
| 11 | 1 | 0 | 1.982652  | -1.408850 | 1.362629  |
| 12 | 1 | 0 | 0.525120  | -1.474837 | -1.324298 |
| 13 | 1 | 0 | 0.111184  | -2.445532 | 0.077935  |
| 14 | 1 | 0 | -0.358127 | -0.361606 | 1.385796  |
| 15 | 1 | 0 | 0.029398  | 0.612622  | -0.016479 |

|                                                  |   |   |           |           |                                   |                                                   |   |   |                                   |           |           |
|--------------------------------------------------|---|---|-----------|-----------|-----------------------------------|---------------------------------------------------|---|---|-----------------------------------|-----------|-----------|
| 16                                               | 1 | 0 | -1.830532 | -0.466346 | -1.291506                         | 28                                                | 1 | 0 | 5.569966                          | 0.374516  | -1.294627 |
| 17                                               | 1 | 0 | -2.232972 | -1.432560 | 0.110780                          |                                                   |   |   |                                   |           |           |
| 18                                               | 1 | 0 | -2.704654 | 0.655545  | 1.411795                          |                                                   |   |   |                                   |           |           |
| 19                                               | 1 | 0 | -2.302844 | 1.619569  | 0.009436                          | <b><i>i</i>-Propyl isocyanate (C<sub>3</sub>)</b> |   |   | <b>E(RB3LYP) = -286.741493078</b> |           |           |
| 20                                               | 1 | 0 | -4.780988 | 1.349786  | 0.204753                          | 1                                                 | 7 | 0 | 0.063332                          | 0.852756  | 0.000000  |
| 21                                               | 1 | 0 | -4.204337 | 0.568267  | -1.266560                         | 2                                                 | 6 | 0 | 1.260943                          | 0.798739  | -0.000000 |
| 22                                               | 1 | 0 | -4.609165 | -0.403967 | 0.145850                          | 3                                                 | 8 | 0 | 2.431599                          | 0.873873  | -0.000000 |
|                                                  |   |   |           |           |                                   | 4                                                 | 6 | 0 | -1.062717                         | -0.070677 | 0.000000  |
|                                                  |   |   |           |           |                                   | 5                                                 | 6 | 0 | -1.062717                         | -0.921666 | 1.269212  |
| <b><i>n</i>-Octyl isocyanate (C<sub>8</sub>)</b> |   |   |           |           | <b>E(RB3LYP) = -483.391146175</b> | 6                                                 | 6 | 0 | -1.062717                         | -0.921666 | -1.269212 |
| 1                                                | 7 | 0 | -3.831270 | 0.032973  | -0.221490                         | 7                                                 | 1 | 0 | -1.956318                         | 0.554975  | 0.000000  |
| 2                                                | 6 | 0 | -3.651884 | 1.211350  | -0.110856                         | 8                                                 | 1 | 0 | -1.056667                         | -0.292338 | 2.158217  |
| 3                                                | 8 | 0 | -3.570933 | 2.381742  | -0.085569                         | 9                                                 | 1 | 0 | -1.950412                         | -1.554697 | 1.297975  |
| 4                                                | 6 | 0 | -3.300690 | -1.214088 | 0.289004                          | 10                                                | 1 | 0 | -0.181195                         | -1.564781 | 1.295629  |
| 5                                                | 6 | 0 | -1.888631 | -1.516360 | -0.213945                         | 11                                                | 1 | 0 | -1.056667                         | -0.292338 | -2.158217 |
| 6                                                | 6 | 0 | -0.825507 | -0.540854 | 0.286269                          | 12                                                | 1 | 0 | -1.950412                         | -1.554697 | -1.297975 |
| 7                                                | 6 | 0 | 0.580669  | -0.886490 | -0.202857                         | 13                                                | 1 | 0 | -0.181195                         | -1.564781 | -1.295629 |
| 8                                                | 6 | 0 | 1.649311  | 0.087935  | 0.290252                          |                                                   |   |   |                                   |           |           |
| 9                                                | 6 | 0 | 3.055670  | -0.253591 | -0.199466                         | <b>Cyclohexyl isocyanate (C<sub>6</sub>)</b>      |   |   | <b>E(RB3LYP) = -403.524684021</b> |           |           |
| 10                                               | 6 | 0 | 4.126195  | 0.719899  | 0.292999                          | 1                                                 | 6 | 0 | -0.705747                         | 0.198213  | 0.000000  |
| 11                                               | 6 | 0 | 5.527708  | 0.368932  | -0.203342                         | 2                                                 | 6 | 0 | -0.034948                         | -0.351658 | 1.264143  |
| 12                                               | 1 | 0 | -3.313155 | -1.188490 | 1.382151                          | 3                                                 | 6 | 0 | -0.034948                         | -1.883275 | 1.263692  |
| 13                                               | 1 | 0 | -3.981619 | -2.003964 | -0.024777                         | 4                                                 | 6 | 0 | 0.624548                          | -2.443389 | 0.000000  |
| 14                                               | 1 | 0 | -1.636087 | -2.530175 | 0.111032                          | 5                                                 | 6 | 0 | -0.034948                         | -1.883275 | -1.263692 |
| 15                                               | 1 | 0 | -1.898429 | -1.529794 | -1.306787                         | 6                                                 | 6 | 0 | -0.034948                         | -0.351658 | -1.264143 |
| 16                                               | 1 | 0 | -1.071765 | 0.474471  | -0.036203                         | 7                                                 | 7 | 0 | -0.728373                         | 1.649818  | 0.000000  |
| 17                                               | 1 | 0 | -0.835844 | -0.525552 | 1.381425                          | 8                                                 | 6 | 0 | 0.059874                          | 2.553027  | 0.000000  |
| 18                                               | 1 | 0 | 0.838290  | -1.900777 | 0.119722                          | 9                                                 | 8 | 0 | 0.730039                          | 3.516124  | 0.000000  |
| 19                                               | 1 | 0 | 0.586273  | -0.906069 | -1.297575                         | 10                                                | 1 | 0 | -1.750770                         | -0.120570 | 0.000000  |
| 20                                               | 1 | 0 | 1.389795  | 1.101540  | -0.032272                         | 11                                                | 1 | 0 | 0.994504                          | 0.019135  | 1.296473  |
| 21                                               | 1 | 0 | 1.642532  | 0.108088  | 1.385161                          | 12                                                | 1 | 0 | -0.544275                         | 0.039267  | 2.146051  |
| 22                                               | 1 | 0 | 3.315353  | -1.267915 | 0.122355                          | 13                                                | 1 | 0 | 0.473495                          | -2.252261 | 2.156199  |
| 23                                               | 1 | 0 | 3.062829  | -0.273254 | -1.294557                         | 14                                                | 1 | 0 | -1.067114                         | -2.243757 | 1.322490  |
| 24                                               | 1 | 0 | 3.865993  | 1.732690  | -0.029089                         | 15                                                | 1 | 0 | 1.686185                          | -2.175838 | 0.000000  |
| 25                                               | 1 | 0 | 4.118658  | 0.738741  | 1.387066                          | 16                                                | 1 | 0 | 0.576372                          | -3.533995 | 0.000000  |
| 26                                               | 1 | 0 | 6.272001  | 1.078030  | 0.161709                          | 17                                                | 1 | 0 | 0.473495                          | -2.252261 | -2.156199 |
| 27                                               | 1 | 0 | 5.824525  | -0.627222 | 0.131900                          | 18                                                | 1 | 0 | -1.067114                         | -2.243757 | -1.322490 |

|    |   |   |           |          |           |
|----|---|---|-----------|----------|-----------|
| 19 | 1 | 0 | 0.994504  | 0.019135 | -1.296473 |
| 20 | 1 | 0 | -0.544275 | 0.039267 | -2.146051 |

|    |   |   |           |           |           |
|----|---|---|-----------|-----------|-----------|
| 15 | 1 | 0 | -0.796936 | 0.062145  | -2.155965 |
| 16 | 1 | 0 | -0.820889 | -1.468446 | -1.269449 |

**t-Butyl isocyanate (C<sub>4</sub>)**      **E(RB3LYP) = -326.075222093**

|    |   |   |           |           |           |
|----|---|---|-----------|-----------|-----------|
| 1  | 7 | 0 | 0.781572  | 0.322357  | 0.000000  |
| 2  | 6 | 0 | 1.687649  | -0.462642 | 0.000000  |
| 3  | 8 | 0 | 2.649871  | -1.133758 | 0.000000  |
| 4  | 6 | 0 | -0.685370 | 0.290384  | 0.000000  |
| 5  | 6 | 0 | -1.169780 | 1.742403  | 0.000000  |
| 6  | 6 | 0 | -1.169780 | -0.435231 | 1.261053  |
| 7  | 6 | 0 | -1.169780 | -0.435231 | -1.261053 |
| 8  | 1 | 0 | -0.806422 | 2.267037  | -0.883225 |
| 9  | 1 | 0 | -2.259491 | 1.775048  | 0.000000  |
| 10 | 1 | 0 | -0.806422 | 2.267037  | 0.883225  |
| 11 | 1 | 0 | -0.820889 | -1.468446 | 1.269449  |
| 12 | 1 | 0 | -2.259810 | -0.440523 | 1.296565  |
| 13 | 1 | 0 | -0.796936 | 0.062145  | 2.155965  |
| 14 | 1 | 0 | -2.259810 | -0.440523 | -1.296565 |

**Phenyl isocyanate (C<sub>7</sub>)**      **E(RB3LYP) = -399.886593579**

|    |   |   |           |           |           |
|----|---|---|-----------|-----------|-----------|
| 1  | 7 | 0 | 1.161964  | 1.053305  | 0.000000  |
| 2  | 6 | 0 | 2.355501  | 0.917221  | 0.000000  |
| 3  | 8 | 0 | 3.524715  | 0.910678  | 0.000000  |
| 4  | 6 | 0 | -0.000000 | 0.278822  | -0.000000 |
| 5  | 6 | 0 | -1.231246 | 0.932076  | -0.000000 |
| 6  | 6 | 0 | -2.405541 | 0.191559  | -0.000000 |
| 7  | 6 | 0 | -2.362263 | -1.198029 | -0.000000 |
| 8  | 6 | 0 | -1.131605 | -1.846975 | 0.000000  |
| 9  | 6 | 0 | 0.048314  | -1.117462 | 0.000000  |
| 10 | 1 | 0 | -1.252470 | 2.012460  | -0.000000 |
| 11 | 1 | 0 | -3.357746 | 0.704523  | -0.000000 |
| 12 | 1 | 0 | -3.278849 | -1.771467 | -0.000000 |
| 13 | 1 | 0 | -1.087880 | -2.927786 | 0.000000  |
| 14 | 1 | 0 | 1.006513  | -1.619563 | 0.000000  |
